# Supplementary material for: HDX-MS reveals dysregulated checkpoints that compromise discrimination against self RNA during RIG-I mediated autoimmunity
Source: PubMed Central journal article supplement (PMC6299088; doi:10.1038/s41467-018-07780-z), 2018-12-18
Supplement: 41467_2018_7780_MOESM1_ESM.pdf [file 41467_2018_7780_MOESM1_ESM.pdf]

**Supplementary Information.**

**HDX-MS reveals dysregulated checkpoints that compromise discrimination against self RNA during RIG-I mediated autoimmunity**

Jie Zheng<sup>1#\*</sup>, Chen Wang<sup>2#</sup>, Mi Ra Chang<sup>1</sup>, Swapnil C. Devarkar<sup>3</sup>, Brandon Schweibenz<sup>3</sup>, Gogce C. Crynen<sup>4</sup>, Ruben D. Garcia-Ordonez<sup>1</sup>, Bruce D. Pascal<sup>1,5</sup>, Scott J. Novick<sup>1</sup>, Smita S. Patel<sup>3</sup>, Joseph Marcotrigiano<sup>2\*</sup>, Patrick R. Griffin<sup>1\*</sup>

<sup>1</sup>The Scripps Research Institute, Department of Molecular Medicine, Jupiter, FL 33458, USA

<sup>2</sup>Structural Virology Section, National Institute of Allergy and Infectious Diseases, National Institutes of Health, Bethesda, MD 20892, USA

<sup>3</sup>Robert Wood Johnson Medical School, Rutgers University, Piscataway, NJ 08854, USA

<sup>4</sup>The Center for Computational Biology, The Scripps Research Institute, Jupiter, FL 33458, USA

<sup>5</sup>Omics Informatics LLC, Honolulu, HI96813, USA

\*To whom correspondence could be addressed:

[pgriffin@scripps.edu](mailto:pgriffin@scripps.edu)

[joseph.marcotrigiano@nih.gov](mailto:joseph.marcotrigiano@nih.gov)

[jzheng@scripps.edu](mailto:jzheng@scripps.edu)

#denotes equal contribution.

a

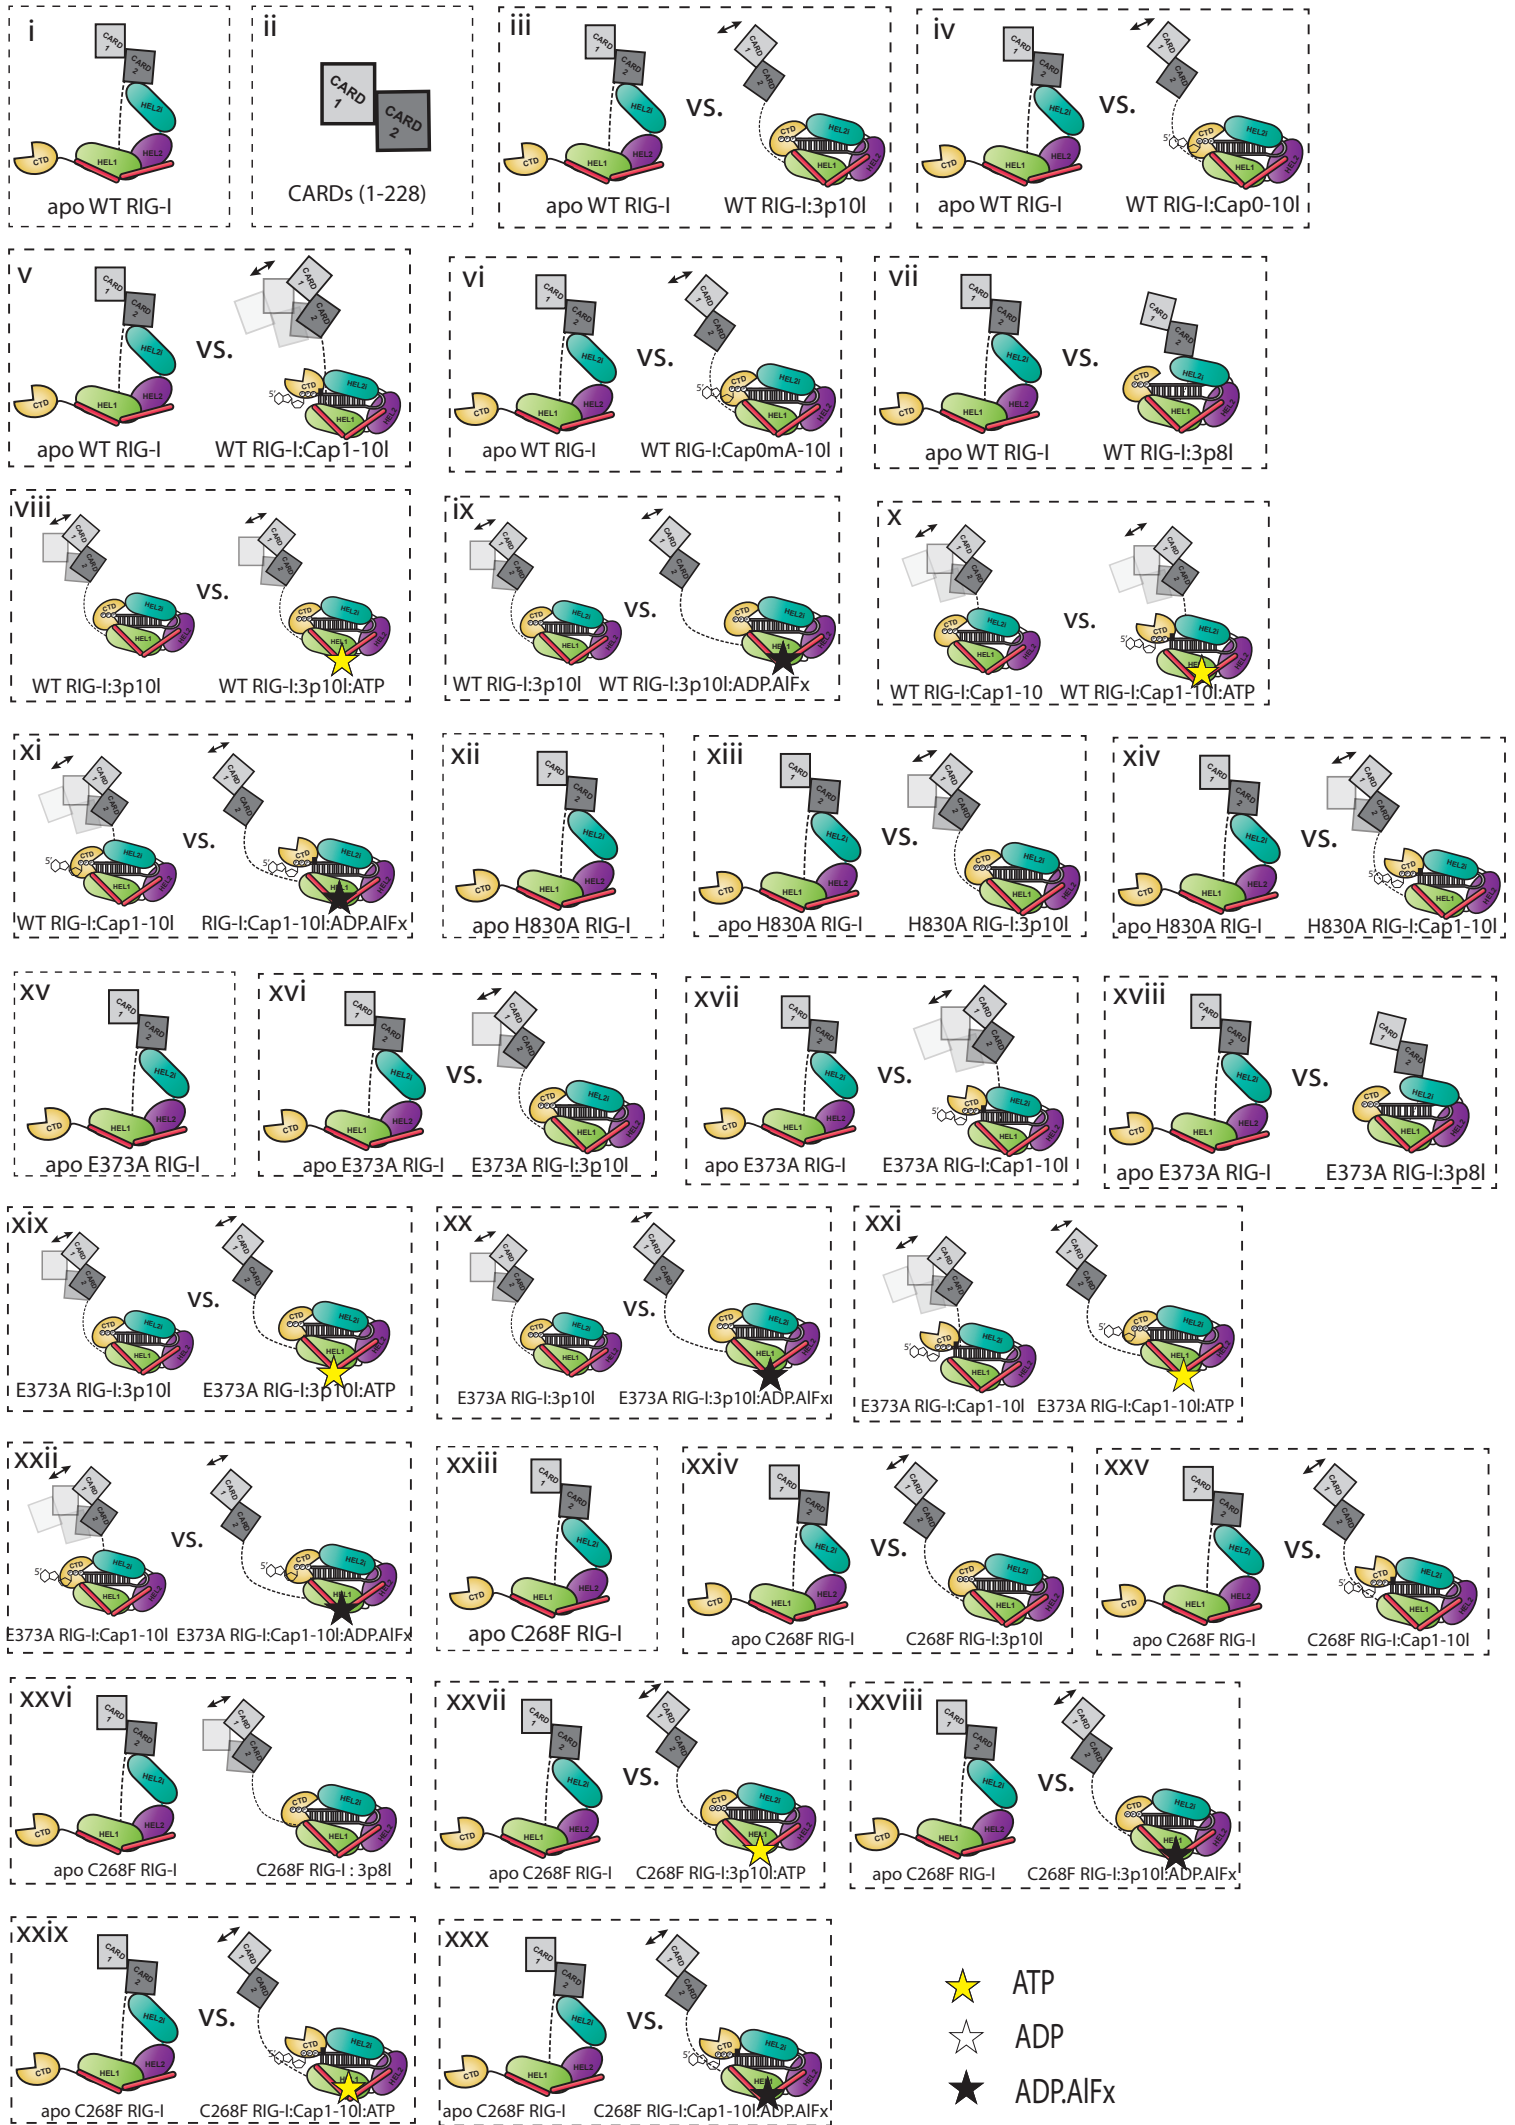

Supplementary Fig. 1a

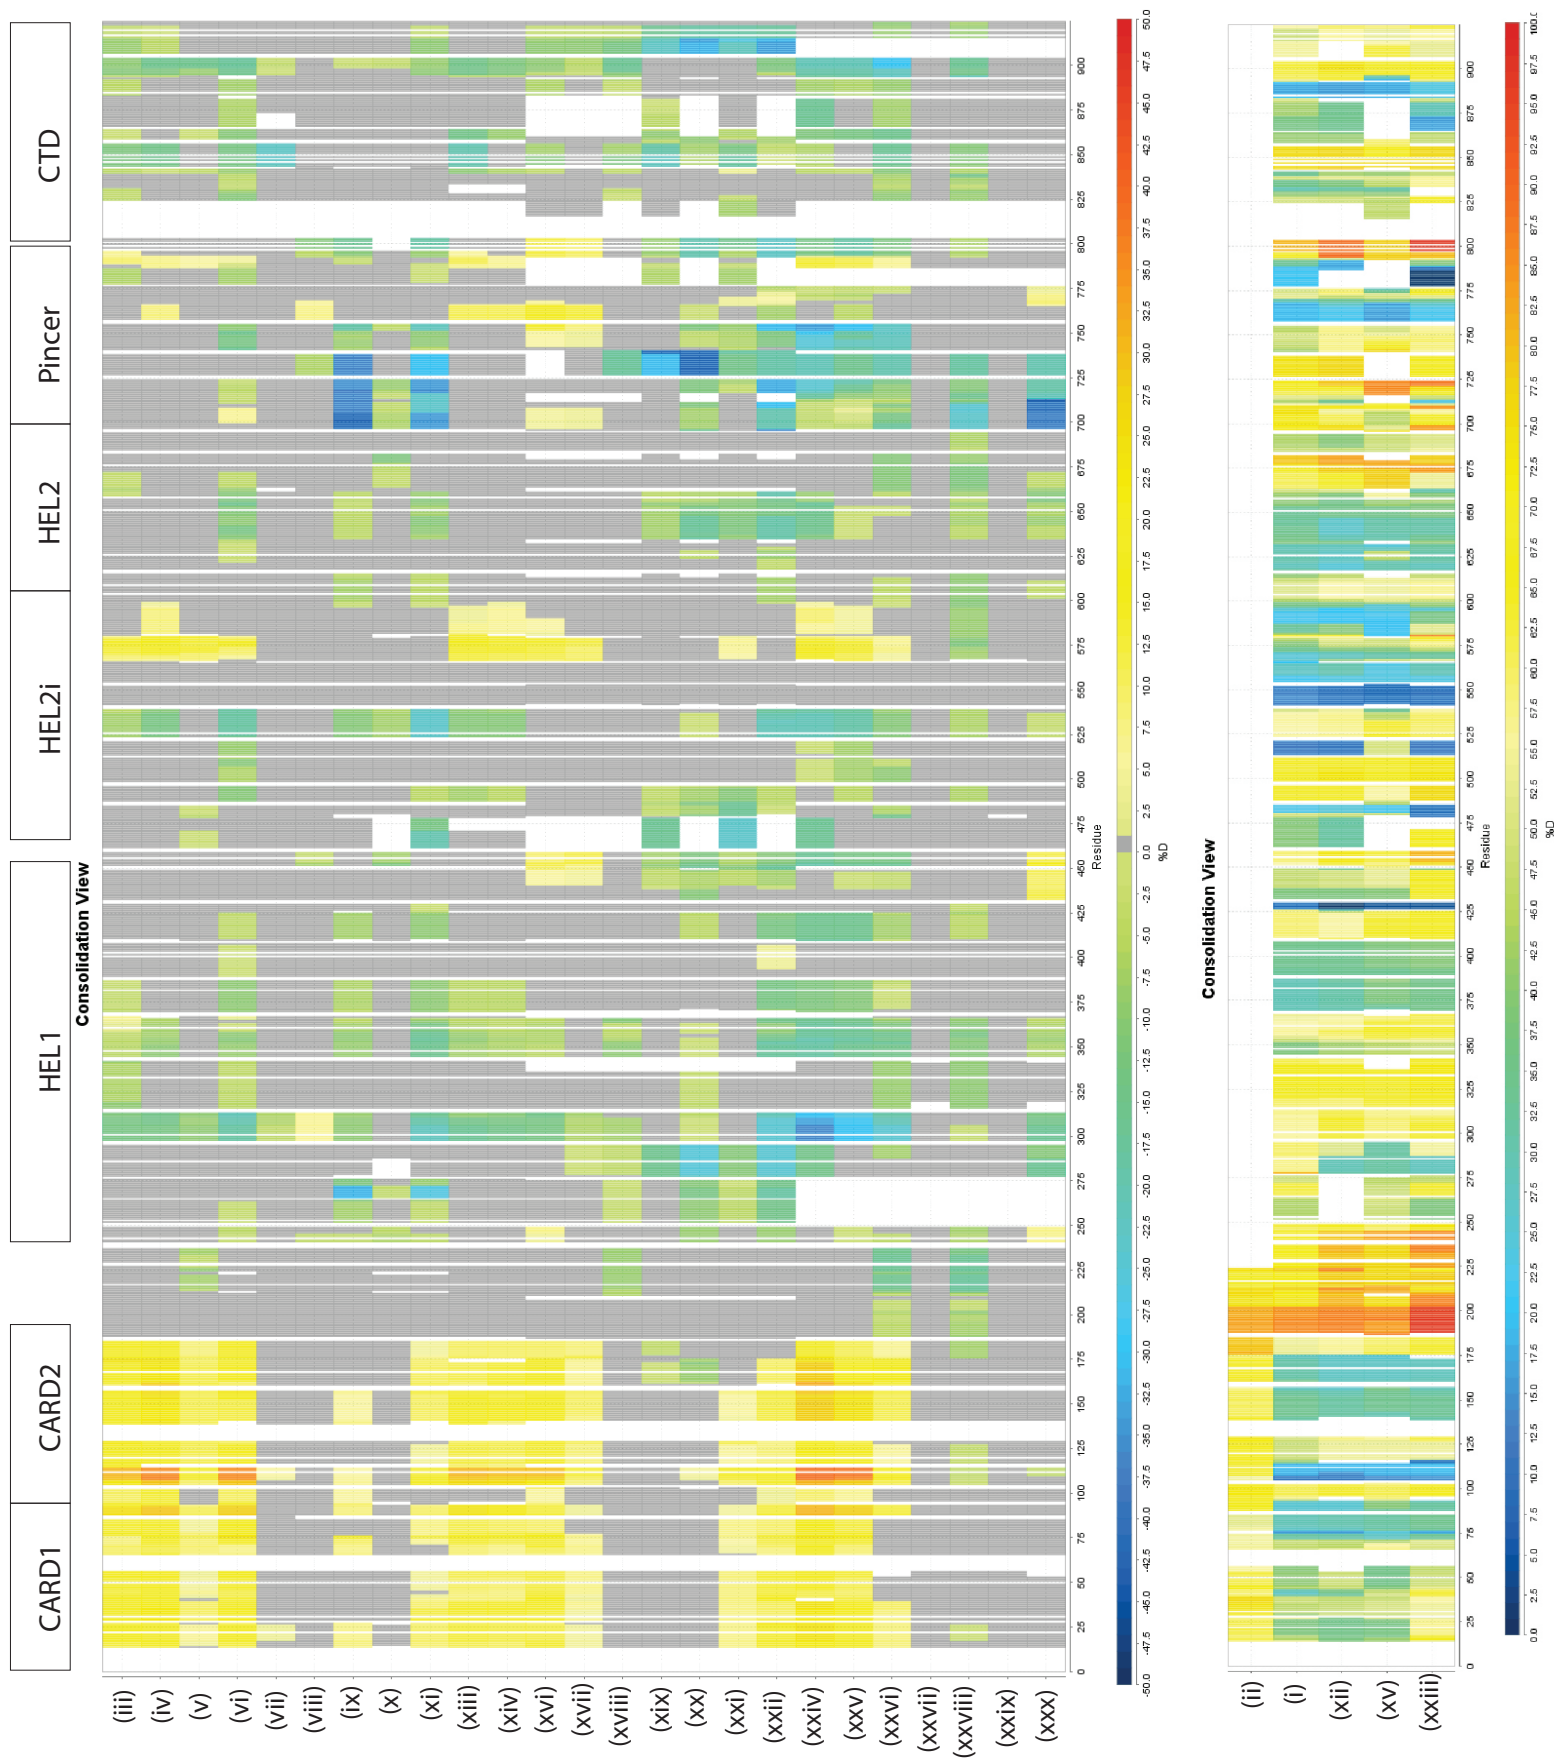

Supplementary Fig. 1b

# Supplementary Fig. 1c

WT RIG-I

peptide sequence

| charge | start | end | structure | (i)    | (ii)    | (iii)   | (iv)    | (v)     | (vi)    | (vii)   | (viii)  | (ix)     | (x)     | (xi)   |
|--------|-------|-----|-----------|--------|---------|---------|---------|---------|---------|---------|---------|----------|---------|--------|
| 3      | 13    | 26  | CARD1     | 36 (3) | 65 (3)  | 15 (5)  | 21 (4)  | 9 (4)   | 17 (3)  | 4 (4)*  | -1 (4)* | 9 (5)    | -1 (2)* | 10 (4) |
| 3      | 16    | 26  |           | 32 (2) | 63 (5)  | 21 (2)  | 23 (5)  | 10 (5)  | 22 (3)  | 6 (4)   | -1 (4)* | 7 (3)    | 0 (2)*  | 13 (4) |
| 2      | 27    | 35  |           | 41 (3) | 72 (5)  | 21 (4)  | 24 (4)  | 11 (3)  | 22 (3)  | 2 (4)*  | -4 (4)* | 3 (3)*   | 0 (2)*  | 15 (3) |
| 2      | 39    | 39  |           | 44 (2) | 76 (4)  | 19 (4)  | 23 (3)  | 10 (2)  | 19 (3)  | 3 (3)*  | -2 (5)* | 2 (4)*   | -1 (2)* | 9 (3)  |
| 2      | 38    | 43  |           | 25 (2) | 56 (4)  | 20 (4)  | 18 (4)  | 3 (3)*  | 13 (4)  | 0 (2)*  | -5 (4)  | 1 (5)*   | 2 (3)*  | 7 (5)  |
| 3      | 40    | 53  |           | 43 (4) | 71 (5)  | 13 (5)  | 17 (3)  | 7 (4)   | 12 (7)  | -2 (4)* | -2 (3)* | 1 (4)*   | -2 (4)* | 1 (6)* |
| 2      | 44    | 56  |           | 39 (3) | 55 (7)  | 15 (4)  | 15 (4)  | 5 (4)   | 16 (5)  | 2 (5)*  | -3 (3)* | 3 (5)*   | -1 (3)* | 8 (5)  |
| 2      | 64    | 74  |           | 47 (4) | 56 (8)  | 11 (5)  | 17 (4)  | 8 (4)   | 9 (4)   | 3 (4)*  | 2 (5)*  | 9 (4)    | -3 (2)* | 0 (4)* |
| 2      | 65    | 74  |           | 46 (2) | 53 (4)  | 10 (3)  | 9 (6)   | 10 (5)  | 6 (6)   | 4 (7)*  | -2 (4)* | 6 (3)    | -1 (3)* | 4 (4)* |
| 2      | 70    | 76  |           | 15 (1) |         | 7 (2)   | 18 (2)  | 11 (3)  | 24 (3)  | 1 (3)*  | 4 (3)*  | 14 (5)   | 3 (2)*  | 12 (3) |
| 2      | 75    | 85  |           | 27 (2) | 54 (5)  | 16 (3)  | 20 (3)  | 9 (3)   | 21 (3)  | 2 (4)*  | -1 (4)* | 5 (3)    | 0 (2)*  | 7 (5)  |
| 2      | 77    | 85  |           | 32 (2) | 50 (6)  | 11 (4)  | 11 (4)  | 5 (3)*  | 14 (4)  | 4 (5)*  | -1 (5)* | 5 (4)*   | -1 (3)* | 7 (3)  |
| 1      | 86    | 92  |           | 22 (2) | 66 (4)  | 29 (3)  | 32 (3)  | 19 (4)  | 30 (3)  | 2 (4)*  | -2 (4)* | 7 (3)    | -1 (3)* | 16 (4) |
| 1      | 86    | 93  |           | 19 (2) | 64 (6)  | 25 (4)  | 32 (3)  | 16 (3)  | 33 (3)  | 2 (4)*  | 1 (5)*  | 10 (6)   | 0 (3)*  | 17 (3) |
| 3      | 94    | 102 |           | 64 (3) | 72 (5)  | 8 (4)   | 13 (3)  | 4 (2)*  | 6 (3)   | -4 (5)* | -2 (4)* | 3 (4)*   | -2 (2)* | 4 (4)* |
| 2      | 103   | 107 |           | 8 (1)  | 52 (3)  | 21 (2)  | 26 (2)  | 7 (2)   | 28 (2)  | 3 (5)*  | 0 (4)*  | 7 (7)    | 1 (3)*  | 20 (2) |
| 3      | 103   | 114 |           | 13 (1) | 60 (4)  | 31 (3)  | 38 (4)  | 18 (5)  | 34 (3)  | 5 (4)*  | 2 (6)*  | 6 (3)    | 0 (3)*  | 13 (5) |
| 2      | 106   | 114 |           | 17 (3) | 66 (6)  | 30 (5)  | 37 (5)  | 21 (4)  | 37 (5)  | 6 (4)   | -1 (5)* | 7 (4)    | 0 (3)*  | 15 (5) |
| 3      | 106   | 114 |           | 14 (3) | 65 (6)  | 35 (3)  | 38 (6)  | 17 (7)  | 38 (4)  | 6 (4)   | -3 (4)* | 7 (3)    | 1 (4)*  | 19 (9) |
| 2      | 108   | 114 | 21 (3)    | 76 (5) | 31 (5)  | 34 (5)  | 18 (6)  | 34 (5)  | 6 (5)   | -2 (6)* | 4 (5)*  | 1 (4)*   | 13 (7)  |        |
| 2      | 115   | 127 | 53 (3)    | 73 (5) | 19 (4)  | 22 (3)  | 13 (3)  | 19 (3)  | 2 (4)*  | -3 (4)* | 3 (4)*  | -2 (2)*  | 6 (3)   |        |
| 3      | 115   | 127 | 46 (2)    | 72 (5) | 19 (4)  | 21 (3)  | 12 (3)  | 18 (3)  | 3 (4)*  | -3 (4)* | 3 (4)*  | -2 (3)*  | 6 (4)   |        |
| 3      | 115   | 126 | 47 (2)    | 71 (4) | 15 (5)  | 12 (4)  | 8 (4)   | 15 (4)  | 1 (4)*  | 2 (5)*  | 2 (5)*  | -2 (3)*  | 7 (4)   |        |
| 3      | 139   | 157 | 28 (1)    | 57 (4) | 22 (2)  | 25 (2)  | 12 (2)  | 23 (2)  | 5 (3)   | -1 (4)* | 7 (2)   | 0 (2)*   | 13 (2)  |        |
| 4      | 159   | 173 | 36 (0)    | 75 (3) | 12 (7)  | 29 (2)  | 14 (4)  | 12 (3)  | -2 (3)* | -1 (5)* | -1 (2)* | 0 (2)*   | 13 (5)  |        |
| 3      | 161   | 173 | 34 (4)    | 65 (5) | 16 (6)  | 18 (4)  | 10 (5)  | 20 (5)  | 3 (0)*  | 0 (4)*  | 4 (4)*  | -2 (16)* | 10 (5)  |        |
| 4      | 161   | 175 | 28 (3)    | 59 (5) | 23 (4)  | 26 (3)  | 10 (5)  | 21 (4)  | -3 (4)* | 3 (4)*  | 2 (4)*  | 3 (3)*   |         |        |
| 3      | 174   | 185 | 57 (1)    | 82 (6) | 19 (3)  | 20 (3)  | 10 (3)  | 17 (3)  | 0 (4)*  | -3 (4)* | 4 (5)*  | -3 (5)*  | 6 (5)   |        |
| 3      | 176   | 185 | 56 (2)    | 77 (5) | 13 (4)  | 15 (4)  | 7 (3)   | 11 (4)  | 0 (3)*  | -2 (4)* | 4 (5)*  | -2 (3)*  | 5 (4)   |        |
| 2      | 186   | 192 | 88 (2)    | 87 (6) | 5 (2)   | 0 (4)*  | -2 (5)* | -1 (5)* | -2 (3)* | -1 (2)* | -3 (2)* | 0 (1)*   | -2 (5)* |        |
| 3      | 186   | 206 | 86 (4)    | 85 (6) | 2 (3)*  | 2 (4)*  | 0 (4)*  | -1 (7)* | -1 (3)* | -1 (3)* | 0 (1)*  | -2 (4)*  | -2 (5)* |        |
| 3      | 186   | 200 | 86 (1)    | 84 (3) | 4 (6)*  | 2 (6)*  | -1 (6)* | -1 (6)* | -1 (6)* | -4 (5)* | -2 (6)* | -3 (5)*  | -1 (5)* |        |
| 3      | 187   | 200 | 84 (1)    | 81 (6) | 5 (2)*  | 3 (4)*  | 2 (4)*  | -1 (4)* | -1 (6)* | -4 (3)* | 5 (2)   | -2 (4)*  | 0 (3)*  |        |
| 2      | 201   | 212 | 70 (4)    | 75 (6) | 4 (5)*  | 3 (4)*  | 2 (5)*  | 1 (5)*  | -2 (5)* | -2 (4)* | 0 (6)*  | -2 (5)*  | 1 (4)*  |        |
| 2      | 212   | 222 | 73 (1)    | 63 (5) | 3 (3)*  | 1 (3)*  | -10 (5) | -4 (4)* | -1 (3)* | -1 (3)* | 5 (5)*  | -2 (5)*  | 1 (5)*  |        |
| 2      | 213   | 222 | 67 (3)    | 70 (5) | 2 (5)*  | -2 (5)* | -11 (6) | 1 (5)*  | 1 (2)*  | -3 (5)* | -1 (5)* | -2 (5)*  | -3 (3)* |        |
| 2      | 223   | 237 | 71 (5)    |        | 5 (6)*  | -2 (4)* | -9 (7)  | -2 (5)* | -2 (6)* | -4 (5)* | -3 (5)* | -2 (6)*  | -1 (5)* |        |
| 1      | 232   | 237 | 72 (5)    |        | 4 (6)*  | -2 (3)* | -13 (7) | -2 (6)* |         |         | -3 (5)* | -2 (4)*  | -2 (6)* |        |
| 2      | 238   | 249 | 79 (4)    |        | 0 (4)*  | 3 (4)*  | -1 (5)* | -6 (4)  | 1 (5)*  | -4 (5)* | -3 (4)* | -6 (4)   | -3 (4)* |        |
| 3      | 238   | 249 | 62 (3)    |        | 1 (4)*  | 3 (4)*  | -2 (4)* | -6 (4)  | 2 (5)*  | -4 (5)* | -4 (4)* | -6 (3)   | -4 (4)* |        |
| 3      | 238   | 245 | 62 (3)    |        | 4 (6)*  | -1 (3)* | -2 (5)* | 3 (6)*  | -3 (2)* | -9 (6)  | -10 (5) | -7 (5)   | -11 (4) |        |
| 3      | 250   | 276 | 46 (2)    |        | 0 (3)*  | 3 (2)*  | 4 (3)*  | -4 (3)* | 3 (3)*  | -1 (4)* | -12 (3) | 3 (7)*   | -9 (4)  |        |
| 4      | 250   | 276 | 51 (1)    |        | -5 (1)* | 3 (1)*  | -3 (3)* | 2 (6)*  | 0 (5)*  | -3 (4)* | -11 (3) | -4 (3)*  |         |        |
| 2      | 264   | 272 | 72 (3)    |        | 2 (4)*  | 0 (3)*  | -3 (8)* | 4 (5)*  | -5 (3)* |         | -46 (6) | -10 (5)  | -32 (5) |        |
| 3      | 277   | 295 | 34 (2)    |        | 2 (3)*  | 1 (2)*  | -2 (3)* | 1 (2)*  | -3 (3)* | -1 (3)* | -3 (2)* |          | -3 (3)* |        |
| 3      | 286   | 295 | 63 (3)    |        | -4 (4)* | -3 (3)* | 4 (5)*  | 4 (3)*  | 4 (3)*  | 0 (4)*  | 2 (4)*  | -2 (4)*  | 0 (6)*  |        |
| 2      | 296   | 306 | 57 (2)    |        | -12 (3) | -12 (4) | -10 (6) | -16 (4) | -4 (4)* | 6 (5)   | -9 (5)  | -4 (5)*  | -26 (6) |        |
| 2      | 296   | 310 | 56 (1)    |        | -14 (3) | -12 (5) | -6 (4)  | -18 (3) | -6 (3)  | 6 (5)   | -10 (5) | -3 (4)*  | -22 (6) |        |
| 3      | 296   | 313 | 53 (1)    |        | -13 (3) | -12 (5) | -14 (4) | -21 (4) | -6 (4)  | 6 (3)   | -10 (5) | 4 (5)*   | -19 (6) |        |
| 3      | 314   | 342 | 59 (2)    |        | -14 (2) | -3 (3)* | -2 (4)* | -6 (3)  | -1 (4)* | -2 (4)* | 0 (3)*  |          | -1 (3)* |        |
| 4      | 318   | 341 | 69 (2)    |        | -3 (2)* | 0 (2)*  | 0 (6)*  | -6 (3)  | -3 (5)* | 3 (2)*  | 1 (4)*  | -1 (3)*  | 4 (0)*  |        |
| 3      | 319   | 339 | 72 (4)    |        | 3 (5)*  | 0 (6)*  | -3 (4)* | -3 (6)* | -3 (3)* | -3 (4)* | -4 (4)* | -5 (5)   | -1 (7)* |        |
| 2      | 343   | 363 | 28 (2)    |        | -6 (4)  | -8 (3)  | -3 (4)* | -10 (3) | -3 (3)* | -2 (4)* | -10 (3) | -4 (4)*  | -16 (4) |        |
| 2      | 343   | 353 | 41 (2)    |        | -3 (3)* | -6 (4)  | -3 (2)* | -9 (4)  | 3 (3)*  | 1 (3)*  | -7 (2)  | -4 (2)*  | -13 (2) |        |
| 2      | 343   | 355 | 58 (2)    |        | -8 (3)  | -11 (3) | -5 (3)  | -11 (3) | -1 (3)* | -1 (3)* | -10 (2) | -5 (3)*  | -20 (3) |        |
| 3      | 343   | 363 | 58 (2)    |        | -6 (3)  | -9 (3)  | -3 (4)* | -11 (3) | -3 (3)* | -2 (4)* | -9 (3)  | -5 (4)   | -16 (3) |        |
| 3      | 343   | 365 | 57 (2)    |        | -6 (3)  | -7 (2)  | -2 (3)* | -9 (3)  | -3 (3)* | -2 (4)* | -9 (3)  | -5 (4)   | -15 (3) |        |
| 3      | 343   | 366 | 54 (2)    |        | -5 (3)  | -7 (2)  | -1 (2)* | -8 (2)  | -1 (3)* | -1 (4)* | -8 (3)  | -5 (4)*  | -14 (2) |        |
| 3      | 368   | 385 | 29 (2)    |        | -6 (2)  | -4 (2)* | -2 (2)* | -10 (2) | 3 (5)*  | 2 (3)*  | -6 (3)  | -1 (2)*  | -10 (3) |        |
| 2      | 370   | 387 | 30 (1)    |        | -5 (2)  | -4 (2)* | -1 (2)* | -10 (2) | 2 (5)*  | 3 (7)*  | -7 (2)  | 2 (7)*   | -10 (3) |        |
| 3      | 370   | 387 | 29 (2)    |        | -6 (2)  | -4 (2)* | -2 (2)* | -10 (2) | 3 (5)*  | 2 (3)*  | -6 (3)  | -1 (2)*  | -10 (3) |        |
| 2      | 388   | 408 | 33 (2)    |        | 1 (2)*  | 4 (3)*  | 2 (4)*  | -5 (2)  | 3 (3)*  | 0 (4)*  | 3 (3)*  | 0 (3)*   | 3 (4)*  |        |
| 2      | 388   | 407 | 33 (1)    |        | 2 (2)*  | 3 (2)*  | 2 (4)*  | -6 (4)  | 4 (4)*  | -1 (4)* | 2 (2)*  | -1 (3)*  | 3 (4)*  |        |
| 2      | 392   | 408 | 39 (2)    |        | 0 (2)*  | 4 (3)*  | 1 (4)*  | -2 (4)* | 1 (3)*  | 0 (3)*  | 2 (3)*  | -1 (3)*  | 2 (4)*  |        |
| 2      | 409   | 425 | 61 (3)    |        | -2 (4)* | -3 (4)* | -1 (4)* | -7 (4)  | -3 (5)* | -1 (5)* | -8 (4)  | -4 (4)*  | -11 (4) |        |
| 2      | 409   | 424 | 59 (3)    |        | -3 (4)* | -3 (4)* | -2 (5)* | -6 (4)  | -4 (2)* | -1 (5)* | -8 (4)  | -5 (4)*  | -10 (4) |        |
| 1      | 425   | 430 | 1 (1)     |        | -1 (1)* | 1 (1)*  | 1 (1)*  | -3 (1)* | 0 (2)*  | 0 (2)*  | 0 (0)*  | 0 (0)*   | 0 (0)*  |        |
| 2      | 425   | 430 | 3 (1)     |        | -1 (1)* | -1 (1)* | -3 (1)* | -2 (1)* | 0 (1)*  | 1 (1)*  | 1 (2)*  | 0 (1)*   | 0 (1)*  |        |
| 2      | 431   | 449 | 43 (2)    |        | -5 (3)* | -1 (3)* | 0 (3)*  | -5 (2)* | 3 (4)*  | 1 (4)*  | 2 (3)*  | -3 (2)*  | -2 (3)* |        |
| 2      | 437   | 448 | 55 (3)    |        | -2 (3)* | -1 (3)* | 1 (3)*  | -2 (3)* | -3 (4)* | -3 (3)* | -2 (3)* | -4 (3)*  | 1 (2)*  |        |
| 3      | 450   | 459 | 55 (4)    |        | 3 (4)*  | 3 (4)*  | 2 (5)*  | 5 (5)*  | 4 (6)*  | -8 (3)  | -5 (3)* | -12 (4)  | 2 (6)*  |        |
| 2      | 452   | 459 | 60 (3)    |        | 1 (4)*  | 4 (4)*  | 4 (4)*  | 2 (4)*  | -1 (6)* | -3 (4)* | -3 (4)* | -6 (4)   | -4 (4)* |        |
| 3      | 452   | 459 | 61 (2)    |        | 2 (4)*  | 0 (4)*  | 1 (4)*  | 1 (4)*  | 0 (6)*  | -4 (6)* | -1 (3)* | -6 (4)   | -5 (4)  |        |
| 3      | 460   | 478 | 39 (3)    |        | 1 (3)*  | -1 (3)* | -5 (4)  | -2 (3)* | -1 (6)* | -1 (3)* | -4 (2)* |          | -13 (6) |        |
| 2      | 479   | 485 | 5 (2)     |        | -1 (2)* | -1 (2)* | -3 (2)* | -2 (2)* | -1 (2)* | 0 (1)*  | 0 (4)*  | 0 (1)*   | 0 (1)*  |        |
| 3      | 486   | 496 | 69 (3)    |        | -4 (5)* | -4 (4)* | -1 (4)* | -11 (4) | 2 (6)*  | -2 (5)* | -1 (5)* | -4 (3)*  | -6 (4)  |        |
| 3      | 497   | 512 | 68 (2)    |        | -1 (4)* | -1 (4)* | -1 (4)* | -7 (4)  | 0 (5)*  | -2 (4)* | 1 (3)*  | -2 (4)*  | 0 (4)*  |        |
| 3      | 497   | 511 | 62 (3)    |        | -1 (4)* | -4 (3)* | -1 (2)* | -13 (3) | -2 (5)* | -3 (4)* | -1 (3)* | -2 (4)*  | -1 (4)* |        |
| 2      | 512   | 521 | 9 (2)     |        | -3 (2)* | -2 (3)* | 0 (2)*  | -8 (2)  | 5 (2)*  | -3 (5)* | 0 (5)*  | 1 (7)*   | -2 (3)* |        |
| 2      | 513   | 521 | 13 (2)    |        | -4 (2)* | -3 (3)* | -2 (3)* | -9 (2)  | 5 (3)*  | 2 (4)*  | 3 (5)*  | -1 (2)*  | 1 (3)*  |        |
| 3      | 522   | 537 | 60 (2)    |        | -9 (3)  | -12 (3) | -4 (4)* | -15 (3) | 1 (6)*  | -2 (4)* | -11 (3) | -8 (3)   | -24 (3) |        |
| 4      | 522   | 539 | 51 (2)    |        | -6 (3)  | -10 (2) | -1 (2)* | -14 (3) | 3 (5)*  | -2 (4)* | -9 (3)  | -7 (3)   | -21 (2) |        |
| 3      | 523   | 537 | 62 (3)    |        | -7 (4)  | -18 (3) | -4 (4)* | -19 (4) | 2 (8)*  | -2 (4)* | -11 (3) | -8 (3)   | -24 (3) |        |
| 4      | 523   | 539 | 49 (2)    |        | -6 (3)  | -11 (3) | -3 (3)* | -20 (4) | 2 (4)*  | -2 (4)* | -10 (3) | -7 (2)   | -24 (2) |        |
| 3      | 540   | 552 | 11 (2)    |        | -1 (3)* | 5 (5)*  | 2 (6)*  | -5 (3)  | 3 (2)*  | 1 (5)*  | 2 (2)*  | 0 (0)*   | 0 (6)*  |        |
| 4      | 540   | 552 | 12 (2)    |        | -1 (4)* | 3 (5)*  | 2 (5)*  | -5 (3)* | 4 (3)*  | 2 (4)*  | 2 (3)*  | 1 (4)*   | -1 (5)* |        |
| 2      | 541   | 552 | 13 (2)    |        | -1 (3)* | 5 (5)*  | 1 (6)*  | -1 (4)* | 4 (2)*  | 2 (5)*  | 3 (4)*  | 0 (5)*   | 2 (7)*  |        |
| 3      | 553   | 565 | 24 (2)    |        | -2 (2)* | 1 (3)*  | -1 (3)* | -5 (3)  | 3 (4)*  | 1 (3)*  | 2 (3)*  | 0 (2)*   | -1 (3)* |        |
| 2      | 557   | 565 | 30 (2)    |        | 0 (3)*  | 0 (3)*  | -2 (3)* | -4 (2)* | 3 (3)*  | 0 (3)*  | 0 (3)*  | 1 (3)*   | 0 (2)*  |        |
| 3      | 557   | 565 | 32 (2)    |        | -1 (3)* | -1 (3)* | -2 (3)* | -5 (3)* | 0 (3)*  | 0 (3)*  | 0 (3)*  | -2 (2)*  | -1 (2)* |        |
| 3      | 565   | 579 | 34 (2)    |        | 1 (3)*  | 12 (4)  | 9 (3)   |         | 2 (3)*  | 0 (5)*  | 2 (2)*  | -1 (4)*  | 2 (3)*  |        |
| 2      | 566   | 574 | 16 (1)    |        | 10 (2)  | 14 (3)  | 10 (2)  | 9 (2)   | 5 (4)*  | 0 (2)*  | 2 (2)*  | -1 (1)*  | 1 (2)*  |        |
| 3      | 566   | 579 | 35 (2)    |        | 14 (4)  | 17 (3)  | 12 (3)  | 11 (3)  | 3 (4)*  | -3 (3)* | 1 (3)*  | -4 (2)*  | -1 (2)* |        |
| 1      | 570   | 574 |           |        |         | 30 (2)  | 21 (3)  | 6 (3)   | 3 (3)*  | 0 (5)*  | 2 (3)*  | -2 (2)*  | 3 (3)*  |        |
| 2      | 570   | 580 | 49 (1)    |        | 15 (5)  | 18 (4)  | 15 (5)  | 14 (4)  | -1 (4)* | 3 (6)*  | 2 (3)*  |          | -2 (8)* |        |
| 2      | 570   | 579 | 49 (2)    |        | 17 (3)  | 19 (3)  | 13 (3)  | 17 (3)  | 4 (4)*  | -2 (4)* | 0 (4)*  | -1 (4)*  | 1 (5)*  |        |

CARD1

Latch region

CARD2

linker

HEL1

motif Ia

motif Ic

motif IIa

HEL2i

CTD:HEL2i

Gate motif



# WT RIG-I

peptide sequence

charge start end structure (i) (ii) (iii) (iv) (v) (vi) (vii) (viii) (ix) (x) (xi)

|                                 |   |     |     |                    |         |         |         |         |         |         |         |         |         |         |
|---------------------------------|---|-----|-----|--------------------|---------|---------|---------|---------|---------|---------|---------|---------|---------|---------|
| DEIEQDLTQRFEFKLQE               | 3 | 580 | 596 | HEL2i              | 25 (2)  | 3 (2)*  | 11 (3)  | 2 (3)*  | 2 (2)*  | 5 (3)*  | 0 (2)*  | 0 (2)*  | -3 (2)* | -1 (2)* |
| DEIEQDLTQRFEFKLQEL              | 3 | 580 | 597 |                    | 25 (1)  | 4 (2)*  | 8 (1)   | 3 (2)*  | 2 (3)*  | 3 (2)*  | 0 (3)*  | 0 (2)*  | -1 (1)* | 0 (2)*  |
| DEIEQDLTQRFEFKLQELSES           | 3 | 580 | 599 |                    | 27 (1)  | 4 (2)*  | 7 (1)   | 3 (2)*  | 1 (2)*  | 3 (3)*  | 0 (3)*  | 0 (3)*  | -1 (2)* | -2 (2)* |
| QELESVSRDPSNENPKLED             | 3 | 595 | 613 |                    | 47 (2)  | 2 (3)*  | 1 (2)*  | 1 (5)*  | -3 (3)* | -1 (3)* | -1 (4)* | -7 (4)  | -3 (4)* | -6 (5)  |
| ESVSRDPSNENPKLEDLC              | 3 | 598 | 615 |                    | 40 (1)  | 0 (1)*  | 3 (3)*  | 2 (3)*  | 0 (2)*  | 4 (6)*  | -3 (3)* | -6 (7)  | 1 (3)*  | -6 (3)  |
| VSRDPSNENPKLED                  | 2 | 600 | 613 | 58 (2)             | 3 (4)*  | 2 (4)*  | 1 (4)*  | -1 (5)* | -2 (5)* | -3 (4)* | -7 (4)  | -2 (4)* | -6 (4)  |         |
| VSRDPSNENPKL                    | 3 | 600 | 611 | 51 (3)             | 4 (4)*  | 3 (6)*  | 2 (5)*  | 1 (10)* | -2 (4)* | -5 (4)  | -10 (4) | -3 (5)* | -6 (5)  |         |
| FILQEEYHLNPET                   | 2 | 616 | 628 | HEL2               | 33 (3)  | -4 (3)* | -1 (3)* | -2 (3)* | -3 (2)* | -1 (3)* | 1 (4)*  | -2 (3)* | 0 (2)*  | -4 (2)* |
| ILQEEYHLNPETIL                  | 2 | 617 | 632 |                    | 22 (1)  | -1 (1)* | 1 (1)*  | 1 (1)*  | -3 (1)* | 2 (3)*  | 1 (2)*  | -2 (3)* | -1 (2)* | -3 (2)* |
| EEYHLNPETITLFFVKTR              | 2 | 620 | 637 |                    | 38 (2)  | 1 (2)*  | 5 (3)*  | 2 (5)*  | -6 (3)  | 5 (4)   | 0 (4)*  | 3 (3)*  | 0 (4)*  | 4 (5)*  |
| FVKTRALVDALKNWIEGNPKL           | 3 | 633 | 653 |                    | 31 (2)  | -3 (3)* | -2 (2)* | -1 (3)* | -8 (3)  | -2 (2)* | 1 (3)*  | -6 (3)  | 3 (3)*  | -11 (2) |
| FVKTRALVDALKNWIEGNPKLSF         | 3 | 633 | 655 |                    | 35 (2)  | -3 (2)* | -3 (2)* | -2 (2)* | -10 (2) |         | 1 (3)*  | -6 (2)  | 4 (4)*  | -10 (2) |
| FVKTRALVDALKNWIEGNPKLSFLKPGIL   | 4 | 633 | 661 | motif IV           | 36 (2)  | -3 (3)* | 0 (2)*  | 5 (2)   | -12 (2) | -3 (0)* | 2 (5)*  | -6 (3)  |         | -12 (4) |
| SFLKPGIL                        | 2 | 654 | 661 |                    | 40 (2)  | 1 (2)*  | 3 (3)*  | 1 (5)*  | -2 (3)* | 0 (2)*  | -1 (5)* | -8 (2)  | -5 (5)  | -12 (5) |
| TGRGKTNQNTGMTLPAQKCIL           | 3 | 662 | 682 | Pincer             | 72 (4)  | 3 (5)*  | 0 (6)*  | -4 (5)* | -3 (5)* | -4 (5)* | -3 (4)* | -4 (4)* | -6 (5)  | -1 (7)* |
| TGRGKTNQNTGMTLPAQKCIL           | 4 | 662 | 682 |                    | 67 (3)  | 4 (4)*  | -3 (4)* | -5 (3)* | -1 (4)* | -2 (5)* | -4 (4)* | -3 (3)* | -6 (5)  | 0 (0)*  |
| PAQKCIL                         | 2 | 676 | 682 |                    | 85 (3)  | -1 (5)* | 1 (3)*  | 0 (4)*  | -3 (6)* | -2 (4)* | 1 (2)*  | -1 (3)* | -14 (6) | -4 (5)* |
| DAFKASGDHNIL                    | 2 | 683 | 694 |                    | 46 (3)  | 0 (3)*  | 2 (4)*  | -2 (3)* | -3 (6)* | -1 (4)* | -2 (3)* | -1 (2)* | -4 (3)* | 0 (4)*  |
| DAFKASGDHNIL                    | 3 | 683 | 694 |                    | 47 (2)  | 0 (3)*  | 0 (4)*  | -3 (3)* | -2 (5)* | 0 (3)*  | -2 (3)* | -2 (3)* | -4 (3)* | 1 (4)*  |
| FKASGDHNIL                      | 3 | 685 | 694 | CTD                | 39 (3)  | -1 (3)* | 0 (4)*  | -3 (4)* | -3 (4)* | 1 (5)*  | -1 (3)* | 0 (3)*  | -2 (2)* | 0 (4)*  |
| IATSVADEGID                     | 2 | 695 | 705 |                    | 71 (2)  | 0 (4)*  | -4 (3)* | -5 (4)  | -3 (6)* | 0 (6)*  | -2 (3)* | -49 (5) | -9 (4)  | -39 (5) |
| IATSVADEGIDIAQCQNLVILYEYVGNVIKM | 3 | 695 | 724 |                    | 68 (2)  | 1 (3)*  | -1 (3)* | -3 (4)* | -2 (1)* | 0 (2)*  | -3 (4)* | -38 (4) | -4 (4)* | -24 (3) |
| YEYVGNVIKM                      | 2 | 715 | 724 |                    | 83 (4)  | 0 (6)*  | -5 (4)* | -2 (4)* | -8 (4)  | -2 (6)* | -4 (5)* | -39 (5) | -12 (4) | -40 (3) |
| YVGNVIKM                        | 2 | 717 | 724 |                    | 72 (3)  | 2 (5)*  | -1 (4)* | 2 (4)*  | 0 (3)*  | -1 (6)* | -4 (5)* | -34 (4) | -12 (4) | -35 (3) |
| IQRGRGRARGSKC                   | 4 | 725 | 738 |                    | 74 (2)  | 3 (4)*  | -3 (4)* | -3 (7)* | 0 (5)*  | 3 (0)*  | -7 (4)  | -38 (5) | 2 (7)*  | -31 (6) |
| FLLTSNAGVIEKEQINM               | 2 | 739 | 755 |                    | 44 (3)  | -1 (4)* | 2 (4)*  | 0 (5)*  | -23 (3) | 3 (5)*  | 2 (4)*  | -9 (3)  | -4 (3)* | -12 (4) |
| LTSNAGVIEKEQINM                 | 2 | 741 | 755 |                    | 55 (3)  | -3 (5)* | -1 (4)* | -2 (4)* | -7 (3)  | -1 (6)* | 0 (1)*  | -10 (4) | -5 (3)* | -15 (3) |
| AGVIEKE                         | 2 | 745 | 751 |                    | 51 (3)  | 4 (4)*  | 2 (3)*  | -3 (5)* |         | -3 (1)* | -2 (1)* | -7 (3)  | -1 (5)* | -2 (5)* |
| KEQINM                          | 2 | 750 | 755 |                    | 41 (3)  | 2 (4)*  | 3 (4)*  | 2 (5)*  | -3 (3)* | -5 (7)* | 4 (5)*  | -24 (2) | -10 (3) | -26 (6) |
| YKEKIMMDSIL                     | 4 | 756 | 766 | Capping loop       | 18 (2)  | 4 (3)*  | 10 (3)  | 3 (5)*  | 5 (5)   | 6 (4)   | 2 (3)*  | -1 (3)* | 1 (5)*  |         |
| YKEKIMMDSIL                     | 3 | 756 | 766 |                    | 18 (3)  | 5 (4)*  | 6 (3)   | 3 (5)*  | -1 (3)* | 5 (4)   | 6 (4)   | 1 (3)*  | -1 (3)* | 1 (5)*  |
| RLQTVDEAVF                      | 2 | 767 | 776 |                    | 52 (2)  | -5 (4)* | -1 (3)* | -4 (3)* | 1 (4)*  | 0 (3)*  | 0 (4)*  | 5 (2)   | -1 (2)* | 3 (2)*  |
| WDEAVF                          | 1 | 771 | 776 |                    | 50 (3)  | 0 (4)*  | -4 (2)* | 2 (2)*  | 4 (2)*  | 1 (4)*  | -2 (3)* | 0 (4)*  | -1 (7)* | 1 (5)*  |
| FREKLIHQTHEKF                   | 4 | 776 | 789 |                    | 19 (4)  | -6 (4)  | 1 (4)*  | 0 (5)*  | -7 (4)  | -2 (0)* | 2 (4)*  | 4 (5)*  | 1 (3)*  | -4 (5)* |
| REKLIHQTHEKF                    | 3 | 777 | 789 |                    | 22 (2)  | -7 (4)  | 0 (3)*  | 0 (5)*  | -8 (4)  | 0 (3)*  | 3 (4)*  | 0 (3)*  |         | -6 (5)  |
| RDSQEKPKVPPDK                   | 2 | 791 | 803 |                    | 81 (4)  | 1 (4)*  | 0 (5)*  | -2 (4)* | -5 (7)  | 0 (6)*  | 11 (5)  | -15 (3) |         |         |
| VRVIEE                          | 2 | 823 | 828 |                    | 62 (3)  | 0 (4)*  | 4 (4)*  | 0 (4)*  | -13 (4) | -3 (4)* | 0 (4)*  | -3 (7)* | -1 (2)* | -2 (2)* |
| VRVIEECHY                       | 2 | 823 | 831 |                    | 41 (2)  | -6 (4)  | 3 (3)*  | 4 (3)*  |         | -3 (4)* | 1 (4)*  | 2 (5)*  | -1 (3)* | -2 (3)* |
| VRVIEECHYTVLGDA                 | 3 | 823 | 837 |                    | 42 (4)  | -1 (2)* | 1 (2)*  | -2 (4)* | -8 (4)  | -2 (2)* | -1 (2)* |         | 0 (3)*  | 0 (5)*  |
| VRVIEECHY                       | 3 | 823 | 831 | 35 (2)             | -7 (5)  | -2 (4)* | 0 (5)*  | -9 (5)  | -2 (6)* | -1 (4)* | 3 (4)*  | -2 (3)* | -2 (5)* |         |
| CHYTVLGDA                       | 2 | 829 | 837 | 26 (1)             | 2 (2)*  | 3 (2)*  | 1 (2)*  | 0 (2)*  | 3 (3)*  | -1 (3)* | 0 (4)*  | 0 (2)*  | -1 (2)* |         |
| TVLGDADFKECF                    | 2 | 832 | 842 | 49 (2)             | -3 (3)* | -1 (3)* | -1 (3)* | -6 (3)  | -1 (3)* | 0 (4)*  | 0 (3)*  | 1 (4)*  | 0 (4)*  |         |
| FKECF                           | 1 | 838 | 842 | 31 (3)             | -8 (3)  | -3 (4)* | -2 (5)* | -10 (4) | 3 (7)*  | 1 (5)*  | -1 (3)* | 5 (3)*  | -1 (5)* |         |
| FKECF                           | 2 | 838 | 842 | 34 (2)             | -9 (3)  | -6 (4)  | -9 (5)  | -9 (4)  | -2 (5)* | 2 (6)*  | 0 (5)*  | 5 (4)*  | 0 (5)*  |         |
| FVSRPHPKPKQFSS                  | 4 | 842 | 855 | RNA binding region | 77 (4)  | -12 (5) | -13 (6) | -4 (4)* | -13 (6) | -21 (5) | 1 (5)*  | 4 (3)*  | -3 (6)* | -4 (5)* |
| VSRPHPKPKQFSSF                  | 3 | 843 | 856 |                    | 74 (5)  | -10 (6) | -15 (5) | -4 (5)* | -12 (6) | -24 (4) | 0 (5)*  | 2 (6)*  | -3 (6)* | -3 (6)* |
| VSRPHPKPKQFSSF                  | 4 | 843 | 856 |                    | 77 (4)  | -12 (5) | -13 (6) | -2 (4)* | -13 (6) | -22 (6) | 1 (5)*  | 4 (3)*  | -3 (6)* | -4 (5)* |
| EKRKIF                          | 2 | 857 | 863 |                    | 43 (3)  | -5 (4)* | -4 (5)* | -5 (5)* | -11 (4) | -2 (4)* | -1 (6)* | -3 (3)* | -1 (4)* | -5 (5)  |
| EKRKIFC                         | 2 | 857 | 864 |                    | 40 (3)  | -3 (3)* | -1 (5)* | -6 (5)  | -9 (6)  | 0 (4)*  | 0 (3)*  | 0 (2)*  |         | -3 (5)* |
| EKRKIFC                         | 3 | 857 | 864 | 41 (4)             | -6 (4)  | -3 (5)* | -4 (6)* | -11 (5) | 2 (4)*  | 0 (5)*  | -1 (3)* | 0 (4)*  | 0 (6)*  |         |
| CARQNCSDHWGIHVKYKT              | 4 | 864 | 881 | 37 (3)             | -1 (3)* | -3 (4)* | -3 (5)* | -7 (4)  |         | 0 (5)*  | -2 (2)* | 2 (3)*  | -1 (4)* |         |
| FEIPVKIESF                      | 2 | 882 | 892 | 11 (2)             | -7 (2)  | -5 (2)* | -4 (3)* | -10 (2) | -1 (4)* | 1 (2)*  | 1 (2)*  | -1 (2)* | -1 (3)* |         |
| FEIPVKIES                       | 2 | 882 | 891 | 16 (2)             | -8 (2)  | -3 (2)* | -2 (2)* | -6 (2)  | -1 (5)* | 3 (2)*  | 3 (2)*  | -1 (2)* | 1 (2)*  |         |
| EIPVKIESF                       | 2 | 883 | 892 | 11 (2)             | -8 (2)  | -4 (2)* | -2 (2)* | -6 (2)  |         | 3 (2)*  | 3 (2)*  | -1 (2)* | 1 (2)*  |         |
| VVEDIATGVQTL                    | 1 | 893 | 904 | RNA binding region | 65 (2)  | -12 (4) | -9 (3)  | -6 (3)  | -14 (3) | -5 (3)  | -1 (3)* | -3 (4)* | -5 (4)* | -10 (2) |
| VVEDIATGVQTL                    | 2 | 893 | 904 |                    | 65 (3)  | -10 (4) | -14 (3) | -11 (4) | -16 (4) | -6 (3)  | 3 (3)*  | -1 (4)* | -5 (4)* | -10 (3) |
| IATGVQTL                        | 2 | 897 | 904 |                    | 66 (3)  | -8 (5)  | -20 (5) | -22 (5) | -18 (4) | -6 (3)  | -1 (6)* | -6 (3)  | -7 (5)  | -6 (4)  |
| YSKWKDFHFEKIPFDPAE              | 3 | 905 | 922 |                    | 54 (3)  | -9 (4)  | -6 (3)  | -3 (3)* | -5 (4)* | -1 (1)* | 2 (4)*  | 1 (3)*  | 3 (4)*  | -10 (4) |
| EKIPFDPAE                       | 2 | 914 | 922 |                    | 35 (3)  | 2 (3)*  | 1 (3)*  | -1 (3)* | -3 (3)* | 2 (5)*  | 0 (4)*  | -1 (4)* | -1 (4)* | 1 (3)*  |
| EKIPFDPAEEMSK                   | 2 | 914 | 925 | 54 (3)             | -2 (4)* | -1 (4)* | -3 (4)* | -5 (4)* | -5 (3)  | -1 (3)* | -1 (2)* | -2 (5)* | -1 (5)* |         |
| EKIPFDPAEEMSK                   | 3 | 914 | 925 | 57 (3)             | 0 (4)*  | 0 (4)*  | -2 (4)* | -5 (4)* | -3 (3)* | -2 (3)* | -2 (3)* | -2 (4)* | -2 (6)* |         |

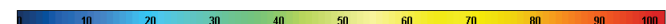

HDX Dynamics Key

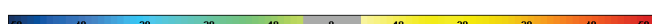

HDX Perturbation Key

# H830A RIG-I

| peptide sequence            | charge | start | end | structure | (xii)   | (xiii)   | (xiv)  |
|-----------------------------|--------|-------|-----|-----------|---------|----------|--------|
| FQDYIRKTLDPITYLS            | 3      | 12    | 27  | CARD1     | 52 (3)  | 11 (3)   | 11 (3) |
| QDYIRKTLDPITYL              | 3      | 13    | 26  |           | 78 (3)  | 11 (3)   | 10 (5) |
| IRKTLDPITYL                 | 3      | 16    | 26  |           | 46 (3)  | 17 (4)   | 16 (6) |
| SYMAPWFRE                   | 2      | 27    | 35  |           | 53 (3)  | 14 (4)   | 14 (4) |
| YMAPWFREEVQ                 | 2      | 28    | 39  |           | 55 (3)  | 14 (4)   | 14 (4) |
| VQYIQA                      | 2      | 38    | 43  |           | 66 (4)  | 8 (5)    | 8 (5)  |
| YIQAENKNGPMEA               | 3      | 40    | 53  |           | 51 (3)  | 9 (4)    | 8 (4)  |
| EKNKNGPMEAAATL              | 2      | 44    | 56  |           | 45 (2)  | 11 (3)   | 11 (5) |
| LQEEGWFRGFL                 | 2      | 64    | 74  |           | 48 (2)  | 9 (4)    | 6 (6)  |
| QEEGWFRGFL                  | 2      | 65    | 74  |           | 52 (1)  | 9 (3)    | 8 (4)  |
| FRGFLDA                     | 2      | 70    | 76  |           | 16 (2)  | 20 (3)   | 19 (4) |
| DALDHAGYSGL                 | 2      | 75    | 85  |           | 34 (2)  | 13 (3)   | 13 (3) |
| LDHAGYSGL                   | 2      | 77    | 85  |           | 36 (2)  | 10 (3)   | 9 (3)  |
| YEAIESW                     | 1      | 86    | 92  |           | 35 (2)  | 25 (5)   | 23 (4) |
| YEAIESWD                    | 1      | 86    | 93  |           | 29 (3)  | 23 (5)   | 22 (5) |
| YRLLL                       | 2      | 103   | 107 |           | 12 (3)  | 24 (5)   | 23 (5) |
| YRLLKRLQPEF                 | 3      | 103   | 114 | 17 (3)    | 33 (5)  | 33 (5)   |        |
| LLKRLQPEF                   | 2      | 106   | 114 | 21 (4)    | 30 (5)  | 28 (6)   |        |
| LLKRLQPEF                   | 3      | 106   | 114 | 18 (4)    | 33 (5)  | 34 (6)   |        |
| LLKRLQPEFKTRIPTDIISD        | 4      | 106   | 126 | 7 (1)     | 10 (1)  | 8 (2)    |        |
| KRLQPEF                     | 2      | 108   | 114 | 21 (4)    | 34 (5)  | 33 (6)   |        |
| KRLQPEF                     | 3      | 108   | 114 | 18 (4)    | 33 (4)  | 33 (6)   |        |
| KTRIPTDIISD                 | 3      | 115   | 126 | 62 (2)    | 12 (4)  | 11 (4)   |        |
| KTRIPTDIISDL                | 2      | 115   | 127 | 59 (2)    | 14 (4)  | 13 (4)   |        |
| KTRIPTDIISDL                | 3      | 115   | 127 | 58 (3)    | 14 (4)  | 13 (4)   |        |
| KTRIPTDIISDLSE              | 3      | 115   | 129 | 63 (2)    | 11 (4)  | 11 (4)   |        |
| EEILQICSTKGMMAEAKL          | 3      | 137   | 155 | 31 (1)    | 17 (3)  | 8 (5)    |        |
| ILQICSTKGMMAEAGA            | 2      | 139   | 152 | 40 (2)    | 20 (2)  | 20 (3)   |        |
| ILQICSTKGMMAEAKL            | 3      | 139   | 155 | 37 (2)    | 16 (3)  | 15 (4)   |        |
| ILQICSTKGMMAEAKLVE          | 3      | 139   | 157 | 29 (1)    | 19 (2)  | 18 (3)   |        |
| LLRSDKENWPKTLKL             | 4      | 159   | 173 | 29 (2)    | 10 (3)  | 18 (3)   |        |
| RSDKENWPKTLKL               | 3      | 161   | 173 | 28 (2)    | 13 (4)  | 10 (6)   |        |
| ALEKERNKFSSEL               | 4      | 174   | 185 | 67 (1)    | 15 (5)  | 13 (8)   |        |
| ALEKERNKFSSEL               | 3      | 174   | 185 | 61 (3)    | 8 (3)   | 8 (4)    |        |
| EKERNKFSSEL                 | 3      | 176   | 185 | 65 (2)    | 10 (4)  | 10 (6)   |        |
| WIVEKGKQDVE                 | 3      | 186   | 196 | 102 (3)   | 0 (5)*  | 0 (6)*   |        |
| WIVEKGKQDVEDL               | 3      | 186   | 200 | 98 (2)    | -2 (5)* | 2 (3)*   |        |
| WIVEKGKQDVEDLED             | 2      | 186   | 202 | 97 (3)    | 0 (4)*  | 1 (5)*   |        |
| WIVEKGKQDVEDLEDKMETSD       | 3      | 186   | 208 | 95 (2)    | 0 (3)*  | -1 (6)*  |        |
| IVEKGKQDVEDL                | 3      | 187   | 200 | 95 (5)    | -2 (5)* | 1 (5)*   |        |
| EDKMETSDIQIF                | 2      | 201   | 212 | 84 (3)    | 1 (4)*  | 1 (6)*   |        |
| IQIFYQEDPECQNLSE            | 2      | 209   | 224 | 70 (2)    | 0 (3)*  | -2 (6)*  |        |
| FYQEDPECQNL                 | 2      | 212   | 222 | 81 (2)    | -2 (3)* | -2 (6)*  |        |
| YQEDPECQNL                  | 2      | 213   | 222 | 81 (3)    | -1 (4)* | -3 (6)*  |        |
| SENSCPPSEVSNTNL             | 2      | 223   | 237 | 83 (4)    | -2 (6)* | -1 (4)*  |        |
| NSCPPSEVSNTNL               | 2      | 225   | 237 | 82 (4)    | -1 (6)* | -1 (3)*  |        |
| VSDTNL                      | 1      | 232   | 237 | 92 (5)    | -2 (6)* | -2 (3)*  |        |
| YSPFKPRN                    | 3      | 238   | 245 | 100 (4)   | -2 (5)* | -1 (7)*  |        |
| YSPFKPRNYQLE                | 3      | 238   | 249 | 74 (3)    | 4 (4)*  | 3 (5)*   |        |
| YSPFKPRNYQLE                | 2      | 238   | 249 | 73 (3)    | 3 (4)*  | 3 (5)*   |        |
| LALPAMKGNITIC               | 2      | 250   | 263 | 32 (3)    | -1 (4)* | 1 (5)*   |        |
| LALPAMKGNITICAPTGGCKTFVSL   | 4      | 250   | 276 | 47 (2)    | 4 (3)*  | 2 (5)*   |        |
| LALPAMKGNITICAPTGGCKTFVSL   | 3      | 250   | 276 | 43 (2)    | -1 (3)* | -5 (3)   |        |
| APTGGCKTF                   | 2      | 264   | 272 | 84 (3)    | -1 (5)* | -1 (6)*  |        |
| LICEHLLKFFPQGGKQKVVVF       | 3      | 276   | 295 | 29 (1)    | 0 (2)*  | 0 (3)*   |        |
| ICEHLLKFFPQGGKQKVVVF        | 3      | 277   | 295 | 28 (2)    | -3 (2)* | -3 (4)*  |        |
| PQGGKQKVVVF                 | 3      | 286   | 295 | 79 (4)    | -1 (4)* | -1 (7)*  |        |
| FANQIPVYEQQ                 | 2      | 296   | 306 | 74 (2)    | -18 (3) | -15 (4)  |        |
| FANQIPVYEQQKSVF             | 2      | 296   | 310 | 66 (2)    | -16 (4) | -14 (5)  |        |
| FANQIPVYEQQKSVFSKY          | 3      | 296   | 313 | 56 (1)    | -10 (2) | -11 (3)  |        |
| FERHGVRTGISGATAENVPVEQVENND | 4      | 314   | 342 | 66 (3)    | -4 (4)* | -3 (4)*  |        |
| FERHGVRTGISGATAENVPVEQVENND | 3      | 314   | 342 | 65 (3)    | -4 (4)* | 0 (7)*   |        |
| GYRVTGISGATAENVPVEQVENN     | 4      | 318   | 341 | 71 (2)    | -3 (5)* | -5 (6)*  |        |
| YRVTGISGATAENVPVEQVIE       | 3      | 319   | 339 | 84 (5)    | -2 (7)* | -2 (8)*  |        |
| ILTPQIL                     | 2      | 343   | 351 | 38 (1)    | -5 (2)* | -4 (2)*  |        |
| ILTPQIL                     | 1      | 343   | 351 | 35 (1)    | -4 (2)* | -3 (2)*  |        |
| ILTPQILVN                   | 2      | 343   | 353 | 38 (1)    | -6 (2)  | -5 (2)*  |        |
| ILTPQILVNN                  | 2      | 343   | 354 | 43 (2)    | -8 (3)  | -8 (4)   |        |
| ILTPQILVNNL                 | 2      | 343   | 355 | 52 (1)    | -11 (2) | -10 (3)  |        |
| ILTPQILVNNLKKGTIPSL         | 3      | 343   | 363 | 72 (3)    | -10 (3) | -8 (4)   |        |
| ILTPQILVNNLKKGTIPSL         | 2      | 343   | 363 | 68 (2)    | -7 (4)  | -6 (4)   |        |
| ILTPQILVNNLKKGTIPSLSI       | 3      | 343   | 365 | 68 (2)    | -9 (3)  | -7 (4)   |        |
| ILTPQILVNNLKKGTIPSLSIF      | 3      | 343   | 366 | 65 (2)    | -9 (3)  | -7 (3)   |        |
| KGTIPSLSIFT                 | 2      | 357   | 367 | 61 (1)    | 4 (3)*  | 4 (3)*   |        |
| KGTIPSLSIFT                 | 3      | 357   | 367 | 61 (1)    | 4 (3)*  | 4 (3)*   |        |
| LMIFDECHNTSKQHPYNNM         | 3      | 368   | 385 | 36 (1)    | -6 (2)  | -6 (2)   |        |
| IFDECHNTSKQHPYNNM           | 3      | 370   | 387 | 36 (2)    | -6 (2)  | -6 (2)   |        |
| IFDECHNTSKQHPYNNM           | 2      | 370   | 387 | 36 (1)    | -6 (2)  | -6 (3)   |        |
| FNYLDQKLGSSGGLPQVIG         | 2      | 388   | 407 | 37 (1)    | 0 (2)*  | 0 (3)*   |        |
| FNYLDQKLGSSGGLPQVIGL        | 2      | 388   | 408 | 36 (1)    | 0 (2)*  | 0 (3)*   |        |
| DQKLGSSGGLPQVIGL            | 2      | 392   | 408 | 43 (1)    | 0 (2)*  | 0 (3)*   |        |
| LTASVGVGDAKNTDEAL           | 2      | 408   | 424 | 70 (3)    | -5 (4)  | -5 (5)*  |        |
| TASVGVGDAKNTDEAL            | 2      | 409   | 424 | 72 (3)    | -5 (4)  | -5 (5)*  |        |
| TASVGVGDAKNTDEALD           | 2      | 409   | 425 | 69 (3)    | -5 (4)* | -4 (5)*  |        |
| DYICKL                      | 2      | 425   | 430 | 3 (1)     | 0 (1)*  | 1 (1)*   |        |
| DYICKL                      | 1      | 425   | 430 | 3 (0)     | 0 (2)*  | 1 (2)*   |        |
| CASLDASVIATVKHNLLEEL        | 2      | 431   | 449 | 37 (1)    | 0 (2)*  | 0 (3)*   |        |
| SVIATVKHNLLEE               | 2      | 437   | 448 | 62 (2)    | -1 (3)* | -1 (3)*  |        |
| EQVVYKPKQF                  | 3      | 450   | 459 | 76 (2)    | 1 (4)*  | 1 (4)*   |        |
| VVYKPKQF                    | 2      | 452   | 459 | 83 (3)    | -1 (5)* | -1 (5)*  |        |
| VVYKPKQF                    | 3      | 452   | 459 | 83 (3)    | -1 (4)* | -1 (5)*  |        |
| FRKVESRISDKF                | 3      | 460   | 471 | 71 (2)    | 0 (3)*  | -3 (16)* |        |
| QLMRDTESL                   | 2      | 477   | 485 | 9 (2)     | 0 (2)*  | -1 (5)*  |        |
| MRDTESL                     | 2      | 479   | 485 | 7 (0)     | 1 (1)*  | 1 (1)*   |        |
| AKRICKLENL                  | 3      | 486   | 496 | 76 (3)    | -8 (3)  | -6 (5)   |        |
| SQIQNREFGTQKYEQ             | 3      | 497   | 511 | 76 (3)    | -4 (5)* | -4 (5)*  |        |
| SQIQNREFGTQKYEQW            | 3      | 497   | 512 | 70 (3)    | -3 (4)* | -3 (5)*  |        |
| WMTVQKACM                   | 2      | 512   | 521 | 11 (4)    | 0 (6)*  | 0 (5)*   |        |
| NTVQKACM                    | 2      | 513   | 521 | 12 (1)    | -2 (2)* | -1 (2)*  |        |
| VFQMPDKDEESRICKA            | 3      | 522   | 537 | 66 (2)    | -11 (3) | -11 (4)  |        |
| VFQMPDKDEESRICKALF          | 4      | 522   | 539 | 58 (2)    | -10 (3) | -9 (3)   |        |
| FQMPDKDEESRICKA             | 3      | 523   | 537 | 64 (2)    | -11 (3) | -11 (4)  |        |
| FQMPDKDEESRICKALF           | 4      | 523   | 539 | 53 (2)    | -9 (2)  | -9 (3)   |        |
| LYTSHLRKYNDAL               | 4      | 540   | 552 | 8 (2)     | 2 (4)*  | 2 (4)*   |        |
| LYTSHLRKYNDAL               | 3      | 540   | 552 | 8 (2)     | 2 (3)*  | 2 (4)*   |        |

# H830A RIG-I

peptide sequence    charge    start    end    structure (xii)    (xiii)    (xiv)

| peptide sequence              | charge | start | end | structure  | (xii)   | (xiii)  | (xiv)   |
|-------------------------------|--------|-------|-----|------------|---------|---------|---------|
| LYTSHLRKYNDAL                 | 4      | 540   | 552 | HEL2i      | 8 (2)   | 2 (4)*  | 2 (4)*  |
| LYTSHLRKYNDAL                 | 3      | 540   | 552 |            | 8 (2)   | 2 (3)*  | 2 (4)*  |
| IIEHARMKDALD                  | 3      | 553   | 565 |            | 23 (2)  | 2 (3)*  | 2 (3)*  |
| HARMKDALD                     | 2      | 557   | 565 |            | 32 (2)  | 1 (2)*  | 1 (3)*  |
| HARMKDALD                     | 3      | 557   | 565 |            | 31 (2)  | 1 (2)*  | 1 (3)*  |
| DYLKDFFSNVRAAGF               | 3      | 565   | 579 |            | 49 (2)  | 14 (4)  | 12 (4)  |
| YLKDFFSNV                     | 2      | 566   | 574 |            | 18 (1)  | 14 (2)  | 13 (2)  |
| YLKDFFSNVRAAGF                | 3      | 566   | 579 |            | 46 (5)  | 12 (5)  | 12 (3)  |
| FFSNV                         | 1      | 570   | 574 |            | 36 (2)  | 27 (4)  | 25 (4)  |
| FFSNVRAAGF                    | 2      | 570   | 579 |            | 58 (2)  | 19 (5)  | 17 (5)  |
| FFSNVRAAGFD                   | 2      | 570   | 580 | 63 (5)     | 15 (6)  | 14 (6)  |         |
| FSNVRAAGF                     | 2      | 571   | 579 | 65 (2)     | 19 (4)  | 17 (5)  |         |
| DEIEQDLTQRFEELQE              | 3      | 580   | 596 | Gate motif | 25 (0)  | 5 (2)   | 6 (2)   |
| DEIEQDLTQRFEELQEL             | 3      | 580   | 597 |            | 25 (1)  | 6 (2)   | 6 (2)   |
| DEIEQDLTQRFEELQELLES          | 3      | 580   | 599 |            | 28 (1)  | 5 (2)   | 6 (2)   |
| QELSVSRDPSNENPKLED            | 3      | 595   | 613 |            | 53 (2)  | 0 (3)*  | 0 (4)*  |
| ESVSRDPSNENPKLEDLC            | 3      | 598   | 615 |            | 45 (1)  | 0 (2)*  | 0 (2)*  |
| VSRDPSNENPKL                  | 3      | 600   | 611 |            | 68 (4)  | 0 (6)*  | -2 (6)* |
| VSRDPSNENPKLED                | 2      | 600   | 613 |            | 58 (3)  | 1 (4)*  | 0 (5)*  |
| FILQEEYHLNPET                 | 2      | 616   | 628 |            | 31 (1)  | 0 (2)*  | 0 (2)*  |
| ILQEEYHLNPETITL               | 2      | 617   | 632 |            | 26 (1)  | 0 (1)*  | 0 (2)*  |
| EYHLNPETITLFLVKTR             | 2      | 620   | 637 |            | 40 (1)  | 0 (2)*  | 1 (3)*  |
| FKVTRALVDALKNWIEGNPKL         | 3      | 633   | 653 | motif IV   | 30 (1)  | -1 (2)* | -2 (3)* |
| FKVTRALVDALKNWIEGNPKLSF       | 3      | 633   | 655 |            | 32 (1)  | -1 (3)* | -3 (4)* |
| FKVTRALVDALKNWIEGNPKLSFLKPGIL | 4      | 633   | 661 |            | 33 (1)  | 0 (2)*  | -2 (5)* |
| WIEGNPKL                      | 2      | 646   | 653 |            | 42 (1)  | 0 (2)*  | 1 (3)*  |
| WIEGNPKLSFLKPGIL              | 2      | 646   | 661 |            | 44 (2)  | 4 (2)*  | 1 (4)*  |
| SFLKPGIL                      | 2      | 654   | 661 |            | 43 (2)  | 1 (2)*  | 2 (4)*  |
| KPGILTGRGKTNQNTG              | 3      | 657   | 672 |            | 30 (4)  | -4 (5)* | -1 (5)* |
| TGRGKTNQNTGMTLPAQKCL          | 3      | 662   | 682 |            | 84 (3)  | -3 (4)* | -3 (5)* |
| PAQKCL                        | 2      | 676   | 682 |            | 77 (1)  | -4 (2)* | 3 (6)*  |
| DAFKASGDHNL                   | 3      | 683   | 694 |            | 55 (3)  | -1 (4)* | -1 (4)* |
| DAFKASGDHNL                   | 2      | 683   | 694 | 52 (3)     | 0 (4)*  | 0 (5)*  |         |
| FKASGDHNL                     | 3      | 685   | 694 | 46 (3)     | 0 (4)*  | -1 (4)* |         |
| IATSVADGID                    | 2      | 695   | 705 | 84 (3)     | -5 (5)* | -3 (4)* |         |
| IATSVADGIDIAQCNL              | 2      | 695   | 711 | 85 (3)     | -2 (6)* | 0 (5)*  |         |
| SVADEGIDIAQ                   | 2      | 698   | 708 | 38 (2)     | 4 (3)*  | 4 (4)*  |         |
| CNLVILYEVVGNV                 | 4      | 709   | 721 | 23 (2)     | 1 (3)*  | 1 (4)*  |         |
| VILYEVVGNVVKM                 | 2      | 712   | 724 | 72 (3)     | -2 (5)* | 0 (4)*  |         |
| YEYVGNVVKM                    | 2      | 715   | 724 | 97 (3)     | -5 (6)* | -5 (6)* |         |
| YVGNVVKM                      | 2      | 717   | 724 | 91 (3)     | -4 (5)* | -4 (6)* |         |
| IQTRGRGRARGSKC                | 4      | 725   | 738 | 66 (3)     | -4 (4)* | -4 (5)* |         |
| FLLTSNAGVIE                   | 2      | 739   | 749 | 65 (1)     | -5 (2)* | -2 (3)* |         |
| FLLTSNAGVIEKEQINM             | 2      | 739   | 755 | 46 (3)     | 4 (4)*  | 1 (4)*  |         |
| LTSNAGVIEKEQINM               | 2      | 741   | 755 | 60 (2)     | 3 (5)*  | 0 (3)*  |         |
| AGVIEKE                       | 2      | 745   | 751 | 62 (2)     | 0 (4)*  | 0 (6)*  |         |
| KEQINM                        | 2      | 750   | 755 | 59 (2)     | 4 (3)*  | 3 (3)*  |         |
| YKEKMMNDSIL                   | 3      | 756   | 766 | 21 (2)     | 11 (3)  | 11 (4)  |         |
| YKEKMMNDSIL                   | 2      | 756   | 766 | 21 (2)     | 11 (3)  | 11 (4)  |         |
| SILRLQT                       | 2      | 764   | 770 | 26 (2)     | 1 (3)*  | 2 (4)*  |         |
| RLQTVWDEAVF                   | 2      | 767   | 776 | 51 (1)     | -2 (3)* | 0 (3)*  |         |
| WDEAVF                        | 1      | 771   | 776 | 75 (2)     | 0 (3)*  | -1 (3)* |         |
| FREKILHIQTHEKF                | 4      | 776   | 789 | -18 (1)    | -2 (2)* | -1 (3)* |         |
| REKILHIQTHEKF                 | 3      | 777   | 789 | 9 (2)      | 0 (4)*  | -2 (3)* |         |
| THEKFIRDS                     | 2      | 785   | 793 | 18 (1)     | 14 (2)  | 13 (2)  |         |
| EKFIRDSQEK                    | 2      | 787   | 796 | 63 (2)     | 10 (4)  | 4 (4)*  |         |
| RDSQEKPKVDPDK                 | 2      | 791   | 803 | 98 (2)     | 0 (4)*  | 0 (5)*  |         |
| VRVIE                         | 2      | 823   | 828 | 65 (2)     | -4 (3)* | -4 (3)* |         |
| TVLGDAFKECF                   | 2      | 832   | 842 | 56 (2)     | -5 (3)* | -3 (3)* |         |
| FKECF                         | 1      | 838   | 842 | 46 (2)     | -14 (3) | -10 (4) |         |
| FKECF                         | 2      | 838   | 842 | 44 (2)     | -14 (3) | -10 (4) |         |
| FVSRPHKPKQFSS                 | 4      | 842   | 855 | 77 (2)     | -19 (4) | -3 (4)* |         |
| VSRPHKPKQFSSF                 | 4      | 843   | 856 | 78 (3)     | -19 (4) | -3 (4)* |         |
| VSRPHKPKQFSSS                 | 3      | 843   | 856 | 77 (2)     | -22 (4) | -4 (4)* |         |
| EKRAKIF                       | 2      | 857   | 863 | 49 (2)     | -14 (2) | -9 (3)  |         |
| EKRAKIFC                      | 3      | 857   | 864 | 44 (3)     | -13 (3) | -10 (3) |         |
| EKRAKIFC                      | 2      | 857   | 864 | 43 (2)     | -13 (4) | -8 (3)  |         |
| CARQNCSDHWGIHVKYKT            | 4      | 864   | 881 | 15 (2)     | -3 (2)* | -2 (2)* |         |
| DWGIHVKYKTFEIPVIESFVV         | 4      | 872   | 894 | 47 (2)     | 4 (3)*  | 3 (5)*  |         |
| FEIPVIESF                     | 2      | 882   | 892 | 14 (1)     | -5 (3)  | -5 (3)* |         |
| FVVEDIATGVQTL                 | 2      | 892   | 904 | 64 (2)     | -12 (4) | -11 (5) |         |
| VVEDIATGVQTL                  | 2      | 893   | 904 | 74 (2)     | -14 (3) | -12 (4) |         |
| VVEDIATGVQTL                  | 1      | 893   | 904 | 72 (2)     | -15 (3) | -12 (4) |         |
| YSKWDFHFKEIPFDPAE             | 3      | 905   | 922 | 52 (2)     | -4 (2)* | -4 (6)* |         |
| EKIPFDPAE                     | 2      | 914   | 922 | 46 (3)     | 1 (3)*  | 1 (4)*  |         |
| EKIPFDPAEMSK                  | 2      | 914   | 925 | 65 (4)     | -2 (5)* | -3 (6)* |         |
| EKIPFDPAEMSK                  | 3      | 914   | 925 | 66 (4)     | -1 (5)* | -2 (6)* |         |

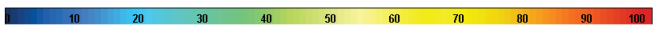

HDX Dynamics Key

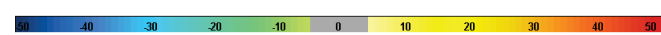

HDX Perturbation Key

E373A RIG-I

peptide sequence

charge

start

end

structure

(xv)

(xvi)

(xvii)

(xviii)

(xix)

(xx)

(xxi)

(xxii)

| peptide sequence           | charge | start | end | structure | (xv)    | (xvi)   | (xvii)  | (xviii) | (xix)   | (xx)    | (xxi)   | (xxii) |
|----------------------------|--------|-------|-----|-----------|---------|---------|---------|---------|---------|---------|---------|--------|
| FQDYIRKLDPTYL              | 2      | 12    | 26  | CARD1     | 34 (2)  | 14 (3)  | 6 (3)   | 0 (3)*  | 2 (2)*  | 1 (2)*  | 7 (3)   | 13 (3) |
| FQDYIRKLDPTYL              | 3      | 12    | 26  |           | 33 (2)  | 14 (3)  | 6 (3)   | 0 (3)*  | 2 (2)*  | 1 (2)*  | 7 (3)   | 13 (3) |
| FQDYIRKLDPTYLS             | 3      | 12    | 27  |           | 49 (1)  | 10 (1)  | 3 (2)*  | 0 (1)*  | 3 (1)*  | 2 (3)*  | 7 (4)   | 24 (4) |
| SYMAPWFREEEVQ              | 2      | 27    | 39  |           | 45 (2)  | 15 (3)  | 7 (3)   | 0 (2)*  | 4 (3)*  | 2 (3)*  | 8 (2)   | 12 (3) |
| YMAPWFRE                   | 2      | 28    | 35  |           | 52 (2)  | 12 (3)  | 5 (3)*  | -1 (2)* | 4 (3)*  | -1 (3)* | 8 (3)   | 10 (4) |
| YMAPWFREEE                 | 2      | 28    | 37  |           | 51 (2)  | 13 (3)  | 6 (3)   | 1 (2)*  | 3 (4)*  | 1 (4)*  | 7 (3)   | 8 (4)  |
| YMAPWFREEEVQ               | 2      | 28    | 39  |           | 47 (2)  | 15 (3)  | 7 (3)   | 0 (2)*  | 4 (3)*  | 1 (4)*  | 8 (2)   | 11 (3) |
| VQYIQA                     | 1      | 38    | 43  |           | 48 (2)  | 16 (3)  | 6 (3)   | -3 (3)* | 3 (2)*  | 2 (3)*  | 8 (3)   | 16 (4) |
| YIQAEKNKGMPEAATL           | 3      | 40    | 56  |           | 38 (2)  | 14 (3)  | 7 (3)   | 0 (3)*  | 4 (3)*  | 3 (3)*  | 8 (3)   | 13 (3) |
| LQEEGWFRGL                 | 2      | 64    | 74  |           | 38 (1)  | 17 (1)  | 13 (2)  | 1 (2)*  | 1 (4)*  | -1 (3)* | 1 (4)*  | 14 (3) |
| QEEGWFRGL                  | 2      | 65    | 74  |           | 47 (2)  | 8 (2)   | 4 (3)*  | 2 (2)*  | 3 (3)*  | 0 (3)*  | 4 (3)*  | 6 (3)  |
| QEEGWFRGLDAL               | 2      | 65    | 77  |           | 45 (3)  | 21 (3)  | 10 (4)  | 0 (4)*  | 3 (3)*  | 0 (4)*  | 8 (3)   | 14 (4) |
| FRGFL                      | 2      | 70    | 74  |           | 19 (1)  | 14 (2)  | 6 (2)   | -2 (2)* | 3 (1)*  | 0 (2)*  | 7 (2)   | 13 (2) |
| FRGLDA                     | 2      | 70    | 76  |           | 15 (1)  | 15 (2)  | 7 (2)   | -2 (1)* | 3 (1)*  | 1 (1)*  | 7 (2)   | 13 (2) |
| DALDHAGYSGL                | 2      | 75    | 85  |           | 30 (2)  | 12 (2)  | 5 (2)   | 0 (3)*  | 3 (2)*  | 2 (3)*  | 7 (2)   | 10 (3) |
| LDHAGYSGL                  | 2      | 77    | 85  |           | 34 (2)  | 8 (2)   | 5 (3)*  | 0 (2)*  | 5 (2)   | 5 (3)*  | 8 (3)   | 9 (3)  |
| YEAIESWD                   | 1      | 86    | 93  |           | 28 (2)  | 18 (2)  | 7 (2)   | -3 (2)* | 4 (3)*  | 2 (2)*  | 9 (3)   | 17 (2) |
| YEAIESWDFKKIEKLEE          | 3      | 86    | 102 |           | 52 (2)  | 7 (2)   | 0 (3)*  | -3 (3)* | 0 (2)*  | -5 (5)* | 0 (4)*  |        |
| EAIESWDFKKIEKLEEY          | 4      | 87    | 103 | 55 (3)    | 10 (3)  | 5 (3)*  | 2 (2)*  | 2 (3)*  |         |         | 6 (4)   |        |
| DFKIEKLEE                  | 3      | 93    | 102 | 69 (2)    | 6 (3)   | 2 (3)*  | 1 (2)*  | 1 (5)*  | -2 (6)* | 1 (4)*  | 3 (4)*  |        |
| FKKIEKLEE                  | 3      | 94    | 102 | 63 (2)    | 5 (3)   | 2 (3)*  | 1 (2)*  | -2 (4)* | -3 (4)* | 1 (3)*  | 3 (4)*  |        |
| YRLLL                      | 2      | 103   | 107 | 11 (4)    | 19 (4)  | 8 (5)   | 0 (4)*  | 2 (2)*  | 0 (2)*  | 8 (5)   | 15 (3)  |        |
| YRLLLRKLRQPEF              | 3      | 103   | 114 | 15 (3)    | 32 (4)  | 9 (5)   | 3 (3)*  | -1 (2)* | 5 (2)*  | 14 (4)  | 14 (4)  |        |
| LLKLRQPEF                  | 2      | 106   | 114 | 19 (4)    | 26 (5)  | 13 (5)  | 3 (5)*  | 4 (2)*  | 7 (2)   | 15 (3)  | 22 (3)  |        |
| KRLQPEF                    | 2      | 108   | 114 | 19 (5)    | 31 (5)  | 15 (6)  | 5 (6)*  | 2 (2)*  | 7 (3)   | 23 (4)  | 24 (4)  |        |
| KRLQPEF                    | 3      | 108   | 114 | 15 (5)    | 31 (5)  | 16 (6)  | 0 (6)*  | 4 (2)*  | 2 (3)*  | 13 (4)  | 22 (4)  |        |
| KTRIPTD                    | 2      | 115   | 122 | 53 (3)    | 15 (5)  | 8 (4)   | 2 (4)*  | 1 (5)*  | -1 (6)* | 5 (4)   | 8 (5)   |        |
| KTRIPTDISD                 | 3      | 115   | 126 | 54 (2)    | 13 (4)  | 8 (4)   | -1 (3)* | 3 (4)*  | 0 (5)*  | 5 (4)   | 7 (4)   |        |
| KTRIPTDISDL                | 2      | 115   | 127 | 52 (2)    | 14 (3)  | 8 (3)   | 2 (2)*  | 2 (4)*  | 1 (4)*  | 6 (3)   | 9 (4)   |        |
| KTRIPTDISDL                | 3      | 115   | 127 | 51 (2)    | 14 (3)  | 8 (3)   | 1 (2)*  | 2 (4)*  | 1 (4)*  | 6 (3)   | 9 (4)   |        |
| KTRIPTDISDSE               | 3      | 115   | 129 | 56 (2)    | 15 (4)  | 11 (3)  | -1 (2)* | 2 (3)*  | 3 (4)*  | 12 (3)  | 8 (3)   |        |
| ILQICSTKGMMAAGAELK         | 3      | 139   | 155 | 34 (2)    | 16 (2)  | 8 (2)   | 3 (3)*  | 3 (3)*  | 0 (2)*  | 5 (4)   | 12 (3)  |        |
| ILQICSTKGMMAAGAELKVE       | 3      | 139   | 157 | 27 (2)    | 20 (3)  | 10 (2)  | 3 (2)*  | 4 (2)*  | 1 (2)*  | 8 (2)   | 14 (3)  |        |
| ICSTKGMMAAGAELK            | 3      | 142   | 155 | 34 (2)    | 21 (3)  | 12 (3)  | 3 (3)*  | 4 (3)*  | 1 (3)*  | 8 (3)   | 13 (3)  |        |
| LRSDKENWPKTLKL             | 4      | 160   | 173 | 29 (3)    | 20 (3)  | 8 (3)   | 2 (3)*  | -6 (3)  | -6 (4)  | 2 (4)*  | 11 (2)  |        |
| LRSDKENWPKTLKLAL           | 4      | 160   | 175 | 26 (3)    | 21 (3)  | 8 (4)   | 4 (3)*  | -4 (3)* | -8 (3)  | 3 (4)*  | 6 (2)   |        |
| ALEKERNKFSSEL              | 3      | 174   | 185 | 82 (2)    | 10 (4)  | 12 (4)  | 1 (2)*  | 1 (4)*  | 1 (4)*  | -1 (6)* | 4 (5)*  |        |
| EKERNKFSSEL                | 3      | 176   | 185 | 59 (1)    | 10 (4)  | 6 (3)   | 1 (2)*  | -9 (4)  | -3 (5)* | -2 (4)* | 4 (4)*  |        |
| LWVEKGKIDVETED             | 3      | 185   | 199 | 88 (2)    | 2 (4)*  | 3 (6)*  | 1 (5)*  | 0 (2)*  | -1 (4)* | 1 (5)*  | -1 (6)* |        |
| WVEKGKID                   | 3      | 186   | 194 | 76 (3)    | 3 (5)*  | 4 (5)*  | 1 (4)*  | 4 (4)*  | 2 (3)*  | 3 (5)*  | 1 (5)*  |        |
| WVEKGKIDVE                 | 2      | 186   | 196 | 89 (1)    | 2 (4)*  | 3 (5)*  | 2 (4)*  | 1 (3)*  | -1 (3)* | 1 (3)*  | -1 (6)* |        |
| WVEKGKIDVE                 | 3      | 186   | 196 | 89 (1)    | 2 (4)*  | 4 (5)*  | 2 (4)*  | 1 (2)*  | 0 (9)*  | 2 (5)*  | 0 (6)*  |        |
| WVEKGKIDVETEDLED           | 2      | 186   | 202 | 85 (3)    | 2 (5)*  | 3 (6)*  | 4 (5)*  | 1 (5)*  | -1 (5)* | 1 (5)*  | -2 (5)* |        |
| EDKMETSD                   | 2      | 201   | 208 | 75 (1)    | 1 (4)*  | 1 (1)*  | 0 (4)*  | 1 (1)*  | 0 (3)*  | 0 (1)*  | -5 (1)* |        |
| IQIFYQEDPEQCQL             | 2      | 209   | 222 | 82 (2)    | 4 (5)*  | 5 (5)*  | -7 (4)  | 1 (5)*  | 1 (5)*  | 2 (6)*  | -2 (5)* |        |
| YQEDPEQCQL                 | 2      | 213   | 222 | 77 (3)    | 1 (5)*  | 2 (6)*  | -10 (5) | 1 (4)*  | 0 (6)*  | 2 (6)*  | -1 (7)* |        |
| YQEDPEQCQLSE               | 2      | 213   | 224 | 76 (3)    | 1 (5)*  | 2 (6)*  | -9 (5)  | 0 (6)*  | 0 (6)*  | 2 (6)*  | 0 (5)*  |        |
| SENSCPSEVSDTNL             | 2      | 223   | 237 | 77 (3)    | 0 (5)*  | 2 (6)*  | -9 (6)  | 1 (4)*  | 0 (5)*  | 2 (6)*  | 0 (7)*  |        |
| YSPFKPRN                   | 2      | 238   | 245 | 89 (2)    | 2 (6)*  | 2 (6)*  | 1 (5)*  | -5 (4)  | -8 (4)  | -5 (7)  | -10 (6) |        |
| YSPFKPRN                   | 3      | 238   | 245 | 89 (2)    | 2 (6)*  | 2 (6)*  | 1 (5)*  | -3 (4)* | -8 (6)  | -4 (5)* | -8 (6)  |        |
| YSPFKPRNVQLE               | 2      | 238   | 249 | 60 (2)    | 7 (4)   | 5 (4)   | 2 (4)*  | -4 (4)* | -9 (5)  | -3 (4)* | -9 (4)  |        |
| LALPAMKGN                  | 3      | 250   | 259 | 45 (4)    | 3 (5)*  | 2 (6)*  | 3 (6)*  | 2 (4)*  | 0 (5)*  | 2 (5)*  | 2 (5)*  |        |
| LALPAMKGNKNTIC             | 3      | 250   | 263 | 32 (4)    | 2 (5)*  | 1 (5)*  | 3 (5)*  | -2 (4)* | -4 (5)* | 0 (5)*  | -2 (5)* |        |
| LALPAMKGNKNTICA            | 3      | 250   | 264 | 67 (2)    | 4 (3)*  | 4 (3)*  | 1 (4)*  | -1 (4)* | -4 (5)* | 0 (5)*  | -5 (4)* |        |
| LALPAMKGNKNTICAPTGGCKT     | 4      | 250   | 271 | 52 (3)    | -3 (4)* | -1 (4)* | -5 (3)  | -5 (3)* | -17 (3) | -9 (4)  | -24 (4) |        |
| LALPAMKGNKNTICAPTGGCKTFVSL | 3      | 250   | 275 | 46 (2)    | 3 (3)*  | 2 (4)*  | -2 (4)* | -5 (3)  | -12 (3) | -6 (4)  | -17 (4) |        |
| LALPAMKGNKNTICAPTGGCKTFVSL | 4      | 250   | 275 | 43 (2)    | 2 (3)*  | -1 (3)* | -6 (3)  | -2 (3)* | -9 (3)  | -5 (2)* | -11 (3) |        |
| LCEHHLKFFPQGGKGVVVF        | 4      | 276   | 295 | 32 (2)    | 1 (3)*  | -3 (3)* | -4 (2)* | -15 (3) | -23 (3) | -10 (5) | -23 (3) |        |
| ICEHHLKFFPQGGKGVVVF        | 4      | 277   | 295 | 33 (2)    | 0 (3)*  | -6 (3)  | -10 (3) | -15 (3) | -28 (3) | -11 (5) | -25 (3) |        |
| FANQIPVYEQKQSVF            | 2      | 296   | 310 | 65 (2)    | -16 (3) | -5 (4)  | -10 (4) | 2 (3)*  | -5 (4)  | -3 (4)* | -29 (4) |        |
| FANQIPVYEQKQSVFSKY         | 3      | 296   | 313 | 57 (2)    | -14 (3) | -8 (3)  | -3 (4)  | 2 (3)*  | -6 (3)  | 3 (3)*  | -21 (4) |        |
| FERHGYRVGTSGATAENVPVEQ     | 3      | 314   | 336 | 66 (2)    | 0 (4)*  | 0 (4)*  | -2 (3)* | -2 (4)* | -2 (3)* | -1 (5)* | -3 (4)* |        |
| FERHGYRVGTSGATAENVPVEQ     | 4      | 314   | 336 | 71 (5)    | 2 (5)*  | 1 (5)*  | -3 (5)* | 2 (3)*  | -7 (4)  | 1 (3)*  | -3 (4)* |        |
| ILLTPQL                    | 2      | 343   | 351 | 32 (2)    | -2 (3)* | 0 (3)*  | -10 (2) | -1 (2)* | -3 (2)* | -1 (3)* | -13 (3) |        |
| ILLTPQLVNNL                | 2      | 343   | 355 | 47 (2)    | -8 (3)  | -4 (3)* | -10 (3) | -2 (2)* | -6 (2)  | 1 (3)*  | -23 (3) |        |
| ILLTPQLVNNLKGKTIPLS        | 3      | 343   | 363 | 81 (2)    | -6 (3)  | -2 (3)* | -5 (3)  | -2 (4)* | -5 (4)* | -2 (3)* | -16 (3) |        |
| ILLTPQLVNNLKGKTIPLSIF      | 3      | 343   | 366 | 59 (2)    | -6 (3)  | -2 (3)* | -11 (4) | -2 (3)* | -5 (3)* | -2 (3)* | -14 (3) |        |
| VNNLKGKTIPLS               | 2      | 352   | 363 | 71 (2)    | -7 (4)  | -3 (4)* | -5 (4)* | -2 (5)* | -5 (5)  | -3 (4)* | -11 (4) |        |
| VNNLKGKTIPLS               | 3      | 352   | 363 | 71 (2)    | -7 (4)  | -3 (4)* | -5 (4)  | -2 (4)* | -5 (5)  | -3 (4)* | -11 (4) |        |
| IFDACHNTSKQHPYNNM          | 4      | 370   | 385 | 40 (1)    | -5 (2)* | 0 (3)*  | 0 (2)*  | 0 (2)*  | -2 (3)* | -1 (3)* | -15 (3) |        |
| IFDACHNTSKQHPYNNM          | 3      | 370   | 387 | 34 (1)    | -4 (2)* | 0 (2)*  | -1 (2)* | 1 (2)*  | -2 (2)* | 0 (3)*  | -13 (3) |        |
| IFDACHNTSKQHPYNNM          | 4      | 370   | 387 | 34 (1)    | -4 (2)* | 1 (2)*  | -1 (2)* | 2 (2)*  | -1 (2)* | 0 (2)*  | -13 (3) |        |
| FNLYDQKLGSSGSLPQVIG        | 2      | 388   | 407 | 34 (2)    | 1 (3)*  | 1 (4)*  | 0 (3)*  | 1 (2)*  | 0 (3)*  | 3 (3)*  | 2 (3)*  |        |
| DQKLGSSGSLPQVIG            | 2      | 392   | 407 | 42 (2)    | 2 (3)*  | 0 (3)*  | 2 (2)*  | 2 (3)*  | 1 (4)*  | 4 (3)*  | 6 (3)   |        |
| DQKLGSSGSLPQVIGL           | 2      | 392   | 408 | 39 (2)    | 2 (3)*  | 1 (4)*  | 0 (3)*  | 0 (2)*  | 0 (3)*  | 3 (3)*  | 2 (3)*  |        |
| TASVGVGDAKNTD              | 2      | 409   | 421 | 77 (3)    | -1 (6)* | 2 (12)* |         | -2 (7)* | -6 (8)  | -3 (5)* | -15 (5) |        |
| TASVGVGDAKNTDEAL           | 2      | 409   | 424 | 64 (3)    | 1 (5)*  | 1 (4)*  | -1 (4)* | -2 (5)* | -6 (6)  | -2 (4)* | -12 (4) |        |
| TASVGVGDAKNTDEALD          | 2      | 409   | 425 | 61 (3)    | 1 (5)*  | 1 (4)*  | -1 (4)* | -1 (5)* | -6 (5)  | -2 (4)* | -11 (4) |        |
| DYICKL                     | 2      | 425   | 430 | 3 (3)     | 1 (3)*  | 0 (4)*  | -1 (3)* | 0 (2)*  | -1 (2)* | 1 (4)*  | -1 (3)* |        |
| YICKL                      | 2      | 426   | 430 | 4 (3)     | 1 (4)*  | 1 (5)*  | -1 (3)* | 0 (2)*  | -1 (2)* | 1 (5)*  | -1 (4)* |        |
| CASLDASVIATVKHNLEEL        | 2      | 431   | 449 | 39 (1)    | 4 (2)*  | 2 (2)*  | 1 (2)*  | -3 (3)* | -11 (2) | -3 (2)* | 3 (2)*  |        |
| SVIATVKHNLEE               | 2      | 437   | 448 | 54 (2)    | 3 (3)*  | 2 (3)*  | 0 (2)*  | -3 (4)* | -5 (3)* | -2 (3)* | -4 (3)* |        |
| SVIATVKHNLEEL              | 2      | 437   | 449 | 54 (2)    | 5 (3)*  | 3 (3)*  | 2 (2)*  | -6 (4)  | -8 (3)  | -5 (3)* | -7 (3)  |        |
| LEQVVYKPKQF                | 3      | 449   | 459 | 63 (2)    | 10 (4)  | 6 (3)   | 0 (4)*  | -9 (4)  | -16 (4) | -11 (3) | -17 (3) |        |
| EQVVYKPKQF                 | 2      | 450   | 459 | 53 (2)    | 16 (4)  | 13 (4)  | 3 (2)*  | -12 (5) | -10 (5) | -6 (3)  | -10 (4) |        |
| EQVVYKPKQF                 | 3      | 450   | 459 | 62 (2)    | 12 (4)  | 8 (3)   | 0 (3)*  | -7 (5)  | -14 (5) | -9 (3)  | -14 (4) |        |
| LMRDTESLAKRICKDLEN         | 4      | 478   | 495 | 44 (2)    | 0 (2)*  | 1 (2)*  | -1 (3)* | -7 (2)  | -12 (1) | -16 (2) |         |        |
| MROTESLAKRICKDLENL         | 4      | 479   | 496 | 44 (2)    | 0 (2)*  | 1 (2)*  | -1 (3)* | -6 (2)  | -12 (1) | -16 (2) | -6 (2)  |        |
| AKRICKDLENL                | 3      | 486   | 496 | 69 (3)    | 0 (4)*  | 1 (4)*  | 1 (3)*  | -4 (5)* | -4 (3)* | -3 (4)* | -6 (4)  |        |
| SQIQNREFGTQKYEQ            | 3      | 497   | 511 | 70 (2)    | 0 (5)*  | 1 (4)*  | 0 (4)*  | 0 (5)*  | -2 (6)* | 1 (4)*  | -3 (5)* |        |
| SQIQNREFGTQKYEQW           | 3      | 497   | 512 | 64 (2)    | 0 (4)*  | 2 (4)*  | 0 (3)*  | 0 (4)*  | -2 (5)* | 1 (4)*  | -4 (4)* |        |
| WVTVQKACM                  | 2      | 512   | 521 | 49 (4)    | -4 (9)* | 1 (6)*  | 3 (2)*  | -2 (4)* | -1 (4)* | -1 (2)* | -4 (2)* |        |
| VFQMPDKDEE                 | 2      | 522   | 531 | 70 (3)    | -1 (6)* | 0 (5)*  | 0 (4)*  | -1 (5)* | -4 (5)* | -3 (5)* | -18 (5) |        |
| VFQMPDKDEESRICKA           | 3      | 522   | 537 | 61 (2)    | -4 (4)* | -1 (4)* | 1 (3)*  | -1 (4)* | -5 (4)  | -3 (3)* | -22 (3) |        |
| VFQMPDKDEESRICKA           | 4      | 522   | 537 | 61 (2)    | -4 (4)* | -1 (3)* | 0 (3)*  | -2 (4)* | -6 (4)  | -4 (3   |         |        |



# E373A RIG-I

peptide sequence

charge

start

end

structure

(xv) (xvi) (xvii) (xviii) (xix) (xx) (xxi) (xxii)

|                        |   |     |     |
|------------------------|---|-----|-----|
| LESVSRDPSNENPKLED      | 3 | 597 | 613 |
| ESVSRDPSNENPKLED       | 3 | 598 | 613 |
| VSRDPSNENPKLED         | 3 | 600 | 613 |
| FILQEEYHLNPET          | 2 | 616 | 628 |
| ILQEEYHLNPET           | 2 | 617 | 628 |
| ILQEEYHLNPETIT         | 2 | 617 | 630 |
| ILQEEYHLNPETITL        | 2 | 617 | 632 |
| EYHLNPET               | 2 | 621 | 628 |
| YHLNPET                | 2 | 622 | 628 |
| FVKTRALVDALKNIWIEGNPKL | 3 | 633 | 653 |
| FVKTRALVDALKNIWIEGNPKL | 4 | 633 | 653 |
| RALVDALKNIWIEGNPKLSFLK | 3 | 633 | 657 |
| SFLKPGIL               | 2 | 654 | 661 |
| LKPGIL                 | 2 | 656 | 661 |
| TGRGKTNQNTGMTLPAQ      | 3 | 662 | 678 |
| TGRGKTNQNTGMTLPAQK     | 4 | 662 | 679 |
| MTLPAQK                | 2 | 673 | 679 |
| DAFKASGDHNL            | 2 | 683 | 694 |
| LIATSVADGDIQAQCN       | 2 | 694 | 710 |
| IAQCNL                 | 1 | 706 | 711 |
| YEYVGNVIKM             | 2 | 715 | 724 |
| LTSNAGVIEKEQINM        | 2 | 741 | 755 |
| KEQINM                 | 2 | 750 | 755 |
| YKEKMMNSIL             | 2 | 756 | 766 |
| YKEKMMNSIL             | 3 | 756 | 766 |
| SILRL                  | 2 | 764 | 768 |
| SILRLQT                | 2 | 764 | 770 |
| RLQTWDEAV              | 2 | 767 | 775 |
| RLQTWDEAVF             | 2 | 767 | 776 |
| DEAVF                  | 1 | 772 | 776 |
| RDSOEKPKVPDK           | 2 | 791 | 803 |
| KALACYTADVRVIE         | 3 | 814 | 827 |
| VRVIE                  | 2 | 823 | 827 |
| VRVIEE                 | 2 | 823 | 828 |
| VRVIEECHY              | 3 | 823 | 831 |
| CHYTVLGDA              | 2 | 829 | 837 |
| TVLGDA                 | 1 | 832 | 837 |
| TVLGDAFKECF            | 2 | 832 | 842 |
| FKECF                  | 2 | 838 | 842 |
| VSRPHPKPKQFSSF         | 3 | 843 | 856 |
| VSRPHPKPKQFSSF         | 4 | 843 | 856 |
| KPKQFSSF EKRA          | 2 | 849 | 860 |
| FEIPVIKIES             | 2 | 882 | 891 |
| FEIPVIKIESF            | 2 | 882 | 892 |
| FVVED                  | 1 | 892 | 896 |
| VVEDIATGVQTL           | 2 | 893 | 904 |
| YSKWKDFHF              | 3 | 905 | 913 |
| YSKWKDFHF EKIPFDPAE    | 4 | 905 | 922 |
| EKIPFDPAE              | 2 | 914 | 922 |
| EKIPFDPAE MSK          | 2 | 914 | 925 |
| EKIPFDPAE MSK          | 3 | 914 | 925 |

|                    |        |         |         |         |         |         |         |         |
|--------------------|--------|---------|---------|---------|---------|---------|---------|---------|
| HEL2               | 53 (2) | 2 (4)*  | 1 (4)*  | -2 (4)* | 0 (4)*  | -4 (5)* | -1 (4)* | -8 (4)  |
|                    | 52 (2) | 1 (4)*  | 1 (4)*  | -3 (3)* | 0 (4)*  | -4 (5)* | -1 (3)* | -8 (4)  |
|                    | 54 (3) | 2 (5)*  | 1 (4)*  | -2 (4)* | 0 (5)*  | -4 (5)* | -1 (4)* | -7 (4)  |
|                    | 31 (2) | 0 (2)*  | 0 (3)*  | 3 (2)*  | -1 (2)* | -5 (2)* | -2 (3)* | -6 (2)  |
|                    | 32 (2) | 1 (2)*  | 2 (3)*  | 0 (2)*  | 0 (2)*  | -3 (2)* | -1 (3)* | -6 (3)  |
|                    | 33 (1) | 0 (1)*  | -1 (2)* | 0 (1)*  | -2 (1)* | -3 (2)* | -3 (2)* | -7 (2)  |
| motif IV           | 24 (1) | 0 (2)*  | 0 (3)*  | -1 (2)* | 0 (2)*  | -3 (2)* | -1 (3)* | -5 (2)  |
|                    | 53 (2) | 0 (4)*  | 1 (3)*  | 0 (3)*  | 2 (3)*  | -1 (3)* | 1 (2)*  | -4 (3)* |
|                    | 61 (2) | 0 (3)*  | 2 (3)*  | -1 (3)* | -1 (3)* | -10 (4) | -2 (3)* | -15 (3) |
|                    | 32 (1) | -1 (2)* | -1 (2)* | -5 (2)  | -7 (2)  | -19 (3) | -11 (4) | -19 (2) |
|                    | 32 (2) | -1 (2)* | -1 (2)* | -5 (2)  | -5 (2)  | -17 (3) | -10 (3) | -19 (2) |
|                    | 32 (1) | -1 (2)* | -1 (2)* | -3 (7)* | -7 (2)  | -19 (3) | -11 (4) | -19 (2) |
| Pincer             | 41 (3) | 4 (4)*  | 2 (5)*  | 3 (5)*  | -2 (4)* | -7 (4)  | -4 (5)* | -15 (5) |
|                    | 64 (2) | 4 (4)*  | 2 (7)*  | 0 (3)*  | -4 (6)* | -11 (4) | -7 (7)  | -25 (7) |
|                    | 78 (4) | 3 (7)*  | 1 (5)*  | -1 (5)* | -3 (7)* | -2 (7)* | 0 (6)*  | 0 (7)*  |
|                    | 78 (3) | 1 (6)*  | 0 (6)*  | -5 (4)  | 0 (4)*  | -2 (6)* | 0 (6)*  | -2 (5)* |
|                    | 85 (3) | 4 (4)*  | 0 (6)*  | -4 (7)* | -3 (5)* | -1 (7)* | 0 (6)*  | -2 (7)* |
|                    | 47 (2) | 2 (4)*  | 2 (3)*  | 1 (3)*  | 2 (4)*  | -1 (4)* | 1 (3)*  | -1 (4)* |
| CTD                | 75 (2) | 5 (4)*  | 2 (3)*  | 3 (4)*  | -1 (6)* | -15 (5) | -5 (3)  | -39 (3) |
|                    | 71 (2) | 3 (4)*  | 1 (4)*  | -2 (3)* | -1 (6)* | -11 (5) | -5 (4)* | -30 (3) |
|                    | 86 (3) | 4 (5)*  | 3 (4)*  | 3 (4)*  | -1 (7)* | -12 (5) | -7 (4)  | -34 (4) |
|                    | 54 (2) | 11 (4)  | 7 (3)   | 3 (3)*  | -1 (5)* | -10 (6) | -10 (4) | -23 (3) |
|                    | 48 (2) | 15 (4)  | 9 (3)   | -2 (3)* | 1 (4)*  | -12 (4) | -8 (3)  | -34 (3) |
|                    | 17 (3) | 20 (4)  | 13 (5)  | 5 (4)*  | 0 (2)*  | -5 (3)  | -1 (4)* | -8 (4)  |
| Capping loop       | 17 (4) | 20 (4)  | 13 (5)  | 4 (4)*  | 1 (2)*  | -6 (3)  | 0 (4)*  | -8 (4)  |
|                    | 11 (4) | 1 (5)*  | 0 (5)*  | 1 (4)*  | -1 (3)* | -2 (3)* | 3 (6)*  | 0 (5)*  |
|                    | 25 (3) | 4 (3)*  | 2 (4)*  | 0 (4)*  | 2 (2)*  | 3 (2)*  | 7 (4)   | 8 (3)   |
|                    | 53 (2) | 3 (3)*  | 2 (3)*  | 1 (3)*  | 0 (4)*  | -2 (6)* | 5 (3)   | 5 (4)   |
|                    | 45 (2) | 1 (2)*  | 2 (2)*  | -4 (2)* | 4 (2)*  | 5 (4)   | 5 (2)   | 7 (3)   |
|                    | 24 (2) | -4 (3)* | -2 (3)* | 4 (3)*  | 2 (7)*  | -1 (4)* | -2 (4)* | -11 (4) |
| RNA binding region | 78 (2) | 12 (5)  | 10 (4)  | 5 (3)*  | -9 (6)  | -20 (5) | -14 (4) | -23 (4) |
|                    | 45 (2) | -1 (4)* | -3 (4)* |         | -5 (6)* |         | -8 (5)  | 0 (2)*  |
|                    | 33 (2) | 2 (3)*  | 1 (3)*  | 0 (3)*  | -1 (3)* | -2 (3)* | 1 (3)*  | -2 (3)* |
|                    | 62 (3) | 1 (3)*  | 2 (4)*  | -2 (4)* | -2 (2)* | -3 (3)* | -1 (4)* | -2 (3)* |
|                    | 40 (2) | -2 (2)* | 2 (3)*  | -6 (2)  | 0 (2)*  | -3 (2)* | -1 (4)* | -3 (3)* |
|                    | 31 (1) | 1 (2)*  | 0 (2)*  | -2 (2)* | 0 (2)*  | 2 (4)   | 2 (2)*  | 0 (2)*  |
| Capping loop       | 52 (2) | 1 (4)*  | 0 (3)*  | -2 (3)* | 0 (5)*  | -1 (5)* | 2 (3)*  | 0 (4)*  |
|                    | 51 (2) | -3 (3)* | -2 (3)* | -5 (3)* | 1 (3)*  | -1 (4)* | 2 (3)*  | 1 (3)*  |
|                    | 38 (2) | -9 (3)  | -5 (4)  | -10 (4) | 0 (3)*  | -2 (3)* | 0 (5)*  | -4 (4)* |
|                    | 77 (3) | -11 (5) | -1 (5)* | -13 (4) | -22 (6) | -7 (6)  | -16 (5) | -3 (4)* |
|                    | 77 (3) | -11 (5) | -2 (5)* | -11 (5) | -22 (5) | -7 (6)  | -17 (4) | -2 (3)* |
|                    | 59 (2) | 5 (3)   | 3 (3)*  | 2 (2)*  | -6 (5)  | -10 (4) | -5 (3)  | -3 (5)* |
| RNA binding region | 16 (2) | -7 (2)  | 3 (4)*  | 1 (2)*  | 1 (2)*  | 0 (2)*  | 0 (4)*  | -3 (3)* |
|                    | 16 (2) | -7 (2)  | -5 (3)* | -7 (2)  | 0 (1)*  | 0 (1)*  | -1 (2)* | -3 (2)* |
|                    | 17 (1) | -5 (2)  | -3 (4)* | -9 (2)  | 0 (3)*  | -1 (2)* | 0 (4)*  | -3 (4)* |
|                    | 69 (2) | -10 (3) | -6 (3)  | -16 (3) | -1 (3)* | -5 (3)  | -3 (4)* | -12 (3) |
|                    | 86 (2) | -11 (3) | -9 (5)  | -10 (2) | -23 (3) | -32 (5) | -17 (6) | -35 (7) |
|                    | 55 (2) | -9 (3)  | -10 (3) | -11 (3) | -24 (5) | -35 (4) | -25 (4) | -33 (9) |
| Capping loop       | 43 (2) | -1 (3)* | 0 (4)*  | -5 (4)  | -1 (3)* | -2 (4)* | 1 (4)*  | -1 (4)* |
|                    | 59 (3) | -1 (5)* | 0 (4)*  | -4 (5)* | 1 (5)*  | -1 (6)* | 1 (4)*  | -2 (5)* |
|                    | 60 (3) | -1 (5)* | 0 (4)*  | -3 (4)* | 1 (5)*  | -1 (6)* | 2 (4)*  | -1 (5)* |

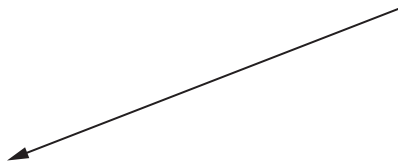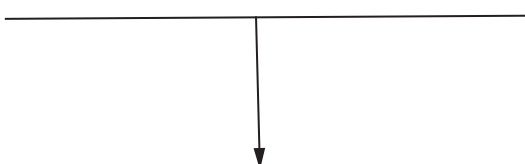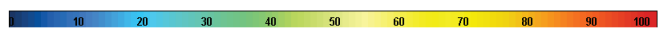

HDX Dynamics Key

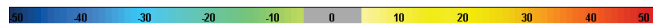

HDX Perturbation Key

# C268F RIG-I

| peptide sequence             | charge | start | end | structure (xxiii) | (xxiv) | (xxv)   | (xxvi)  | (xxvii) | (xxviii) | (xxix)  | (xxx)    |         |         |
|------------------------------|--------|-------|-----|-------------------|--------|---------|---------|---------|----------|---------|----------|---------|---------|
| FQDYIRKLDPTVYLS              | 3      | 12    | 27  | CARD1             | 38 (2) | 23 (3)  | 17 (3)  | 8 (2)   | 1 (1)*   | -5 (3)* | 1 (2)*   | 1 (3)*  |         |
| IRKLDPTVYL                   | 3      | 16    | 26  |                   | 36 (2) | 27 (3)  | 21 (3)  | 8 (3)   | 0 (2)*   | -6 (3)  |          | 0 (3)*  |         |
| SYMAMPWFRE                   | 2      | 27    | 35  |                   | 47 (2) | 21 (3)  | 20 (3)  | 8 (2)   | -4 (3)*  | -1 (3)* | -2 (4)*  | -5 (4)* |         |
| YMAPVFRREEVQ                 | 2      | 28    | 39  |                   | 45 (2) | 24 (3)  | 20 (3)  | 10 (2)  | -3 (3)*  | -4 (4)* |          | -1 (3)* |         |
| VQYVQA                       | 2      | 38    | 43  |                   | 34 (2) |         | 12 (3)  | 0 (4)*  | -5 (2)*  | 0 (4)*  | 0 (2)*   | -1 (2)* |         |
| YIQAEKNKMGMEAE               | 3      | 40    | 53  |                   | 47 (3) |         | 10 (4)  | -3 (3)* | -4 (4)*  | -2 (4)* | -2 (6)*  | -4 (4)* |         |
| LQEEGWFRGFL                  | 2      | 64    | 74  |                   | 52 (1) |         | 19 (6)  | 7 (3)   | 0 (2)*   | 2 (5)*  | -3 (5)*  | 1 (3)*  | 2 (3)*  |
| FRGFLDA                      | 2      | 70    | 76  |                   | 15 (1) |         | 23 (2)  | 21 (1)  | 5 (3)*   | -1 (2)* | 0 (2)*   | 0 (2)*  | -2 (1)* |
| DALDHAGYSGL                  | 2      | 75    | 85  |                   | 28 (2) |         | 19 (3)  | 15 (3)  | 5 (2)    | -3 (3)* | -3 (3)*  | 0 (4)*  | -1 (3)* |
| LDHAGYSGL                    | 2      | 77    | 85  |                   | 33 (3) |         | 14 (4)  | 10 (4)  | -2 (4)*  | -3 (4)* | -4 (3)*  | 0 (5)*  | -1 (3)* |
| YEAEISW                      | 1      | 86    | 92  | 25 (2)            |        | 33 (3)  | 30 (3)  | 14 (4)  | -1 (3)*  | -2 (3)* | 0 (2)*   | -1 (2)* |         |
| YEAEISWD                     | 1      | 86    | 93  | 26 (3)            |        | 30 (3)  | 26 (3)  | 12 (3)  | -2 (3)*  | -4 (3)* | -1 (2)*  | -1 (3)* |         |
| FKKIEKLEE                    | 3      | 94    | 102 | 64 (1)            |        | 9 (4)   | 6 (4)   | 2 (2)*  | -3 (3)*  | -1 (4)* | 0 (0)*   | -2 (4)* |         |
| YRLLL                        | 2      | 103   | 107 | 9 (1)             |        | 28 (2)  | 25 (3)  | 8 (4)   | -2 (2)*  | -1 (2)* | -2 (1)*  | -3 (4)* |         |
| YRLLLKRLOPEF                 | 3      | 103   | 114 | 12 (4)            |        | 41 (4)  | 37 (5)  | 23 (5)  | -3 (3)*  | -6 (2)  | -1 (4)*  | -3 (4)* |         |
| LLKRLOPEF                    | 2      | 106   | 114 | 12 (4)            |        | 35 (5)  | 36 (4)  | 23 (4)  | -2 (2)*  | -4 (4)* |          | 0 (3)*  |         |
| LLKRLOPEF                    | 3      | 106   | 114 | 16 (4)            |        | 46 (5)  | 40 (5)  | 22 (5)  | -3 (3)*  | -6 (4)  | 0 (4)*   | -1 (4)* |         |
| KRLOPEF                      | 2      | 108   | 114 | 21 (5)            |        | 38 (6)  | 42 (6)  | 23 (5)  | -1 (1)*  | -4 (4)* | -4 (4)*  | -9 (5)  |         |
| KRLOPEF                      | 3      | 108   | 114 | 20 (5)            |        | 41 (6)  | 41 (6)  | 13 (6)  | 0 (1)*   | -6 (3)  | -2 (2)*  | -6 (5)  |         |
| KTRIPTDISDL                  | 2      | 115   | 127 | 51 (2)            |        | 22 (3)  | 17 (3)  | 8 (2)   | 2 (4)*   | -6 (4)  | -2 (2)*  | 1 (4)*  |         |
| KTRIPTDISDL                  | 3      | 115   | 127 | 51 (2)            |        | 22 (3)  | 17 (4)  | 7 (2)   | -1 (4)*  | -6 (4)  | -5 (6)   | 1 (4)*  |         |
| KTRIPTDISDLSE                | 3      | 115   | 129 | 58 (1)            |        | 21 (3)  | 13 (6)  | 4 (2)*  | 2 (4)*   | -2 (4)* | 2 (2)*   | 3 (4)*  |         |
| ILQICSTKGMAGAGA              | 2      | 139   | 152 | 37 (2)            |        | 30 (3)  | 25 (4)  | 12 (2)  | -2 (4)*  | -3 (3)* | 2 (3)*   | 0 (4)*  |         |
| ILQICSTKGMAGAGAEKL           | 3      | 139   | 155 | 34 (4)            |        | 26 (4)  | 21 (4)  | 10 (4)  | -2 (2)*  | -2 (2)* | 1 (1)*   | 0 (3)*  |         |
| ILQICSTKGMAGAGAEKLVE         | 3      | 139   | 157 | 28 (2)            |        | 29 (3)  | 26 (3)  | 13 (3)  | -2 (2)*  | -2 (3)* | 1 (3)*   | -1 (3)* |         |
| LLRSDKENWPKTLKL              | 4      | 159   | 173 | 28 (2)            |        | 23 (3)  | 26 (4)  | 14 (2)  | -5 (4)*  | -2 (4)* | -2 (3)*  | 0 (3)*  |         |
| RSDKENWPKTLKLAL              | 4      | 161   | 175 | 26 (3)            |        | 24 (4)  | 14 (3)  | 18 (3)  | 2 (2)*   | -3 (5)* | -1 (4)*  | -3 (3)* |         |
| ALEKERNKFSLE                 | 3      | 173   | 185 | 51 (2)            |        | 23 (4)  | 12 (3)  | 7 (3)   | 0 (1)*   | -9 (4)  | 2 (2)*   | 1 (2)*  |         |
| EKERKFSLE                    | 3      | 176   | 185 | 60 (2)            |        | 17 (3)  | 11 (4)  | 6 (2)   | 0 (3)*   | -8 (4)  | 0 (1)*   | 0 (5)*  |         |
| WIVEKGKDVETEDL               | 3      | 186   | 196 | 89 (3)*           |        | 5 (5)*  | -1 (6)* | -7 (5)  | 0 (5)*   | -11 (5) | 2 (6)*   | 3 (6)*  |         |
| WIVEKGKDVETEDL               | 3      | 186   | 200 | 92 (3)            |        | 3 (4)*  | 0 (5)*  | -5 (5)  | -1 (4)*  | -8 (4)  | -1 (6)*  | 2 (5)*  |         |
| WIVEKGKDVETEDLED             | 2      | 186   | 202 | 86 (3)            |        | 4 (4)*  | 0 (5)*  | -6 (4)  | 5 (2)*   | -11 (5) | 1 (3)*   | 1 (6)*  |         |
| WIVEKGKDVETEDLEDKMETSD       | 3      | 186   | 208 | 87 (2)            |        | 3 (3)*  | 0 (5)*  | -7 (3)  | 3 (4)    | -8 (6)  | 1 (5)*   | 1 (4)*  |         |
| MEKGKDVETEDL                 | 3      | 187   | 200 | 85 (3)            |        | 4 (4)*  | 0 (5)*  | -5 (4)* | -3 (6)*  | -5 (4)  | 2 (5)*   | 1 (5)*  |         |
| EDKMETSDIQIF                 | 2      | 201   | 212 | 79 (2)            |        | 4 (4)*  | 1 (4)*  | -3 (2)* | -2 (5)*  | -3 (2)* | 1 (5)*   | 2 (5)*  |         |
| IQIFYQEDPECCQLNSE            | 2      | 209   | 224 | 87 (3)*           |        | 2 (6)*  | -3 (6)* | -11 (4) | -2 (4)*  | -14 (6) | 2 (6)*   | 3 (6)*  |         |
| FYQEDPECCQLN                 | 2      | 212   | 222 | 72 (3)            |        | 4 (5)*  | 0 (6)*  | -14 (5) | -2 (6)*  | -18 (6) | 1 (6)*   | 2 (6)*  |         |
| YQEDPECCQLN                  | 2      | 213   | 222 | 79 (4)            |        | 3 (5)*  | 0 (6)*  | -17 (5) | -1 (6)*  | -17 (6) | 1 (7)*   | 1 (7)*  |         |
| SENSCPPSEVSDTNL              | 2      | 223   | 237 | 78 (3)            |        | 3 (5)*  | 0 (6)*  | -16 (5) | 0 (5)*   | -17 (5) | 1 (5)*   | 2 (6)*  |         |
| NSCPPSEVSDTNL                | 2      | 225   | 237 | 81 (4)            |        | 2 (4)*  | -1 (5)* | -16 (5) | -2 (6)*  | -15 (5) | 1 (5)*   | 1 (6)*  |         |
| VSDTNL                       | 1      | 232   | 237 | 83 (3)            |        | 1 (5)*  | 0 (6)*  | -13 (5) | 0 (5)*   | -9 (5)  | 1 (6)*   | 1 (6)*  |         |
| YSPFKPRN                     | 3      | 238   | 245 | 94 (3)            |        | -3 (5)* | 0 (7)*  | -12 (5) | -4 (6)*  | -6 (4)  | -2 (6)*  |         |         |
| YSPFKPRNYQLE                 | 3      | 238   | 249 | 65 (3)            |        | 0 (3)*  | -3 (4)* | -5 (3)* | -3 (4)*  | -8 (4)  | 1 (4)*   | 6 (4)   |         |
| YSPFKPRNYQLE                 | 2      | 238   | 249 | 65 (2)            |        | 0 (3)*  | -6 (4)  | -5 (3)  | -4 (4)*  | -8 (3)  | -2 (0)*  | 8 (5)   |         |
| LICEHLKFKFQGGKGVVVF          | 3      | 276   | 295 | 31 (3)            |        | -14 (4) | 1 (4)*  | -3 (3)* | 4 (1)*   | -4 (3)* | -1 (2)*  | -15 (5) |         |
| ICEHLKFKFQGGKGVVVF           | 3      | 277   | 295 | 28 (1)            |        | -13 (4) | 3 (2)*  | -2 (2)* | 3 (3)*   |         | -4 (3)*  | -16 (3) |         |
| FANQIPVYEQQKSVF              | 2      | 296   | 306 | 74 (3)            |        | -42 (5) | -33 (4) | -29 (4) | -4 (4)*  | -7 (4)  | -1 (4)*  | -18 (4) |         |
| FANQIPVYEQQKSVFSKY           | 3      | 296   | 313 | 68 (3)            |        | -37 (4) | -31 (4) | -21 (4) | -4 (4)*  | -5 (4)* | 0 (4)*   | -15 (4) |         |
| FERHGYRVTGISGATAENVPVEQIVENN | 4      | 314   | 342 | 62 (2)            |        | -31 (3) | -27 (3) | -19 (3) | -3 (3)*  |         | 0 (3)*   | -11 (3) |         |
| GYRVTGISGATAENVPVEQIVENN     | 4      | 318   | 341 | 59 (1)            |        | -1 (1)* | -5 (2)* | -9 (2)  |          | -10 (4) | 0 (4)*   |         |         |
| YRVTGISGATAENVPVEQIVE        | 3      | 319   | 339 | 60 (1)            |        | 0 (2)*  | -2 (5)* | -9 (2)  | -3 (2)*  | -9 (3)  | 1 (4)*   | -2 (2)* |         |
| ILLTPQL                      | 2      | 343   | 351 | 78 (3)            |        | 2 (4)*  | -5 (2)  | -9 (5)  | -5 (4)   | -10 (5) | 1 (6)*   | 0 (6)*  |         |
| ILLTPQL                      | 1      | 343   | 351 | 32 (1)            |        | -15 (2) | -12 (2) | -15 (1) | -2 (2)*  | -5 (1)* | -1 (2)*  | -5 (2)  |         |
| ILLTPQLVN                    | 2      | 343   | 353 | 32 (1)            |        | -18 (2) | -13 (2) | -7 (1)  | -2 (2)*  | 0 (2)*  | -1 (2)*  | -6 (2)  |         |
| ILLTPQLVNNL                  | 2      | 343   | 355 | 34 (1)            |        | -16 (2) | -14 (2) | -22 (2) | -2 (2)*  | -4 (2)* | 0 (2)*   | -5 (2)* |         |
| ILLTPQLVNNLKKGTIPSL          | 3      | 343   | 363 | 48 (2)            |        | -26 (2) | -21 (3) | -13 (2) | -3 (3)*  | -5 (3)  | -2 (3)*  | -10 (3) |         |
| ILLTPQLVNNLKKGTIPSL          | 2      | 343   | 363 | 64 (3)            |        | -17 (3) | -16 (3) | -15 (3) | -4 (3)*  | -11 (3) | -1 (3)*  | -8 (3)  |         |
| ILLTPQLVNNLKKGTIPSLSI        | 3      | 343   | 365 | 62 (3)            |        | -18 (3) | -17 (4) | -15 (3) | -4 (3)*  | -11 (3) | -1 (3)*  | -8 (3)  |         |
| ILLTPQLVNNLKKGTIPSLSIF       | 3      | 343   | 366 | 61 (2)            |        | -16 (3) | -14 (3) | -14 (3) | -4 (3)*  | -12 (3) | -1 (3)*  | -8 (3)  |         |
| LMFDECHNTSKQHPYNNM           | 3      | 368   | 385 | 59 (2)            |        | -15 (3) | -14 (3) | -13 (3) | -3 (3)*  | -17 (3) | -1 (3)*  | -7 (3)  |         |
| IFDECHNTSKQHPYNNM            | 3      | 370   | 387 | 30 (2)            |        | -11 (2) | -11 (3) | -5 (2)  | -1 (4)*  | -3 (3)* | 1 (3)*   | -1 (2)* |         |
| FNYLDQKLGSSGSLPQVIGL         | 2      | 388   | 407 | 33 (2)            |        | -11 (2) | -11 (3) | -6 (2)  | -1 (3)*  | -3 (3)* | 0 (2)*   | -1 (2)* |         |
| DQKLGSSGSLPQVIGL             | 2      | 392   | 408 | 36 (2)            |        | 1 (3)*  | -1 (4)* | -2 (3)* | -2 (3)*  | -5 (2)* | 1 (3)*   | 3 (3)*  |         |
| LTASVGVGDAKNTDEAL            | 2      | 408   | 424 | 33 (3)            |        | 0 (3)*  | -1 (4)* | -2 (3)* | -2 (3)*  | -3 (3)* | 1 (3)*   | 3 (3)*  |         |
| TASVGVGDAKNTDEAL             | 2      | 409   | 424 | 37 (3)            |        | 1 (3)*  | -2 (4)* | -3 (3)* | -2 (3)*  | -3 (2)* | 1 (3)*   | 3 (3)*  |         |
| TASVGVGDAKNTDEALD            | 2      | 409   | 425 | 63 (3)            |        | -17 (3) | -17 (3) | -6 (8)  | -2 (5)*  | -3 (3)* | 1 (9)*   | -3 (3)* |         |
| DYICKL                       | 1      | 425   | 430 | 64 (3)            |        | -13 (4) | -14 (4) | -12 (4) | -3 (3)*  | -7 (3)  | 0 (4)*   | -3 (4)* |         |
| CASLDASVIATVKHNLLEEL         | 2      | 431   | 449 | 61 (3)            |        | -14 (4) | -14 (5) | -10 (4) | -4 (3)*  | -8 (3)  | 0 (4)*   | -2 (4)* |         |
| SVIATVKHNLLEEL               | 2      | 437   | 448 | -23 (2)           |        | 0 (2)*  | 0 (3)*  | -1 (2)* | 0 (2)*   | 1 (1)*  | 1 (3)*   | 0 (3)*  |         |
| EQVYYPKQKF                   | 3      | 450   | 459 | -11 (2)           |        | -1 (2)* | 0 (4)*  | -1 (2)* | 0 (3)*   | 2 (1)*  | 0 (4)*   | 0 (4)*  |         |
| VVYYPKQKF                    | 2      | 452   | 459 | 35 (1)            |        | -1 (1)* | -2 (2)* | -1 (1)* | -1 (2)*  | -4 (1)* | 1 (2)*   | 12 (2)  |         |
| FRKVESRISDFKFYIAQL           | 3      | 460   | 478 | 60 (2)            |        | -5 (2)* | -6 (3)  | -7 (4)  | -1 (3)*  | -5 (3)* | -2 (12)* | 10 (4)  |         |
| MLRMDTESL                    | 2      | 477   | 485 | 69 (2)            |        | -19 (3) | -16 (4) | -16 (3) | -3 (3)*  | -1 (3)* | 0 (3)*   | 21 (4)  |         |
| MRDTESL                      | 2      | 479   | 485 | 75 (3)            |        | -14 (3) | -12 (4) | -12 (4) | -4 (3)*  | -3 (4)* | 1 (4)*   | 10 (4)  |         |
| AKRICKDLENL                  | 3      | 486   | 496 | 75 (3)            |        | -14 (4) | -10 (4) | -10 (4) | -4 (3)*  | -3 (4)* | 0 (4)*   | 8 (5)   |         |
| SQIQNREFGTQ                  | 2      | 497   | 507 | 32 (2)            |        | -16 (3) | 3 (3)*  | -4 (2)* | 0 (2)*   | -4 (1)* | 0 (2)*   | 1 (2)*  |         |
| SQIQNREFGTQKYEQ              | 3      | 497   | 511 | 47 (2)            |        | -1 (4)* | 0 (4)*  | -14 (3) | -1 (3)*  | -2 (1)* |          | -5 (3)* |         |
| SQIQNREFGTQKYEQW             | 3      | 497   | 512 | 8 (4)             |        | 0 (1)*  | 0 (2)*  | -2 (1)* | -1 (2)*  | 0 (1)*  | 0 (2)*   | -1 (2)* |         |
| WIVTVQKACM                   | 2      | 512   | 521 | 68 (1)            |        | -2 (2)* | -6 (3)  | -4 (3)* | 3 (1)*   | -7 (4)  | 1 (4)*   | 2 (3)*  |         |
| WIVTVQKACM                   | 2      | 513   | 521 | 79 (3)            |        | -5 (6)  | -7 (5)  | -17 (4) | -2 (7)*  | -2 (4)* | 2 (5)*   | 0 (5)*  |         |
| VFQMPDKDEESRICKA             | 3      | 522   | 537 | 73 (2)            |        | -6 (3)  | -8 (3)  | -9 (3)  | -3 (4)*  | -5 (4)* | 1 (4)*   | 3 (4)*  |         |
| VFQMPDKDEESRICKALF           | 4      | 522   | 539 | 65 (2)            |        | -2 (5)* | -8 (4)  | -4 (4)* | -2 (4)*  | -2 (4)* | 2 (4)*   | 5 (5)   |         |
| FQMPDKDEESRICKA              | 3      | 537   | 537 | 9 (1)             |        | -5 (2)  | -8 (4)  | 0 (2)*  | 1 (3)*   | 1 (7)*  | 1 (2)*   | 1 (2)*  |         |
| LYTSHLRKYNDAL                | 4      | 540   | 552 | 12 (2)            |        | -6 (2)  | -7 (2)  | -1 (2)* | -1 (2)*  | 1 (2)*  | 1 (2)*   | 0 (2)*  |         |
| LYTSHLRKYNDAL                | 3      | 540   | 552 | 58 (2)            |        | -23 (5) | -18 (5) | -11 (2) | -3 (4)*  | -7 (2)  | -1 (3)*  | -7 (3)  |         |
| ISEHARMKDALD                 | 3      | 553   | 565 | 53 (2)            |        | -18 (2) | -17 (3) | -9 (2)  | 0 (3)*   | -7 (2)  | -1 (3)*  | -5 (3)  |         |
| HARMKDALD                    | 2      | 557   | 565 | 60 (2)            |        | -19 (3) | -19 (4) | -11 (3) | -5 (3)*  | -7 (4)  | -3 (3)*  | -5 (3)  |         |
| YLKDFFSNV                    | 2      | 566   | 574 | 9 (3)             |        | 1 (4)*  | 0 (4)*  | 2 (4)*  | -3 (2)*  | -2 (4)* | 0 (3)*   | 0 (3)*  |         |
| YLKDFFSNVRAAGF               | 3      | 566   | 579 | 9 (3)             |        | 2 (4)*  | 0 (4)*  | 2 (4)*  | -2 (3)*  | -2 (4)* | 0 (3)*   | 1 (4)*  |         |
| FFSNV                        | 1      | 570   | 574 | 9 (3)             |        | 2 (4)*  | 0 (4)*  | 2 (4)*  | -2 (3)*  | -2 (4)* | 0 (3)*   | 1 (4)*  |         |
| FFSNVRAAGF                   | 2      | 570   | 579 | 23 (1)            |        | 2 (3)*  | -1 (2)* | -1 (2)* | -3 (6)*  | -4 (3)* | 0 (1)*   | 1 (2)*  |         |
| DEIEQDLTQRFEELQLE            | 3      | 580   | 596 | 34 (1)            |        | 1 (2)*  | -4 (2)* | -3 (2)* | -2 (2)*  | -4 (2)* | -3 (1)*  | 0 (2)*  |         |
| DEIEQDLTQRFEELQLEL           | 3      | 580   | 597 | 16 (1)            |        | 14 (2)  | 12 (2)  | 6 (1)   | -2 (2)*  | -5 (2)  | 0 (2)*   | 0 (2)*  |         |
| DEIEQDLTQRFEELQLELES         | 3      | 580   | 599 | 40 (3)            |        | 20 (4)  | 12 (5)  | 2 (5)*  | -3 (2)*  | -15 (5) | -3 (14)* | 2 (4)*  |         |
| ESVSRDPSNENPKLEDLC           | 3      | 598   | 615 | 33 (2)            |        | 28 (2)  | 27 (3)  | 13 (2)  | -4 (3)*  | -5 (3)* | 0 (4)*   | -2 (4)* |         |
| VSRDPSNENPKL                 | 3      | 600   | 611 | 9 (3)             |        | 51 (2)  | 21 (4)  | 18 (5)  | 5 (3)*   | -2 (5)* | -9 (5)*  | -1 (5)* |         |
| VSRDPSNENPKLED               | 2      | 600   | 613 | 17 (1)            |        | 10 (1)  | 6 (1)   | 3 (2)*  | -2 (2)*  | -7 (2)  | -1 (3)*  | -5 (3)  |         |
| FLQEEYHLNPET                 | 2      | 616   | 628 | 22 (1)            |        | 9 (2)   | 6 (2)   | 3 (1)*  | -2 (2)*  | -10 (2) | 0 (2)*   | -3 (2)* |         |
| ILQEEYHLNPETITL              | 2      | 617   | 632 | 24 (1)            |        | 8 (2)   | 5 (2)   | 1 (1)*  | -2 (2)*  | -10 (2) | 0 (2)*   | -4 (2)* |         |
| EYHLNPETITL                  | 2      | 620   | 637 | 44 (2)            |        | 4 (2)*  | 4 (2)*  | -4 (3)* | -1 (1)*  | -10 (3) | 2 (4)*   | -2 (2)* |         |
| FVKTRALVDALKNWENPKL          | 3      | 633   | 653 | 63 (4)            |        | 3 (5)*  | 1 (6)*  | -8 (5)  | -3 (5)*  | -9 (4)  | -2 (6)*  | -9 (6)  |         |
| FVKTRALVDALKNWENPKLSF        | 3      | 633   | 655 | 56 (3)            |        | 3 (4)*  | 0 (5)*  | -8 (4)  | -3 (4)*  | -9 (3)  | -1 (5)*  | -5 (5)  |         |
| FVKTRALVDALKNWENPKLSFLKPGIL  | 4      | 633   | 661 | 26 (1)            |        | 0 (2)*  | -2 (1)* | 4 (2)*  | -1 (2)*  | -5 (2)  | 1 (2)*   | -2 (2)* |         |
| SFLKPGIL                     | 2      | 654   | 661 | 22 (1)            |        | 0 (2)*  | -3 (1)* | -2 (1)* | -1 (2)*  | -4 (2)* | 1 (1)*   | -2 (2)* |         |
| KPGLTGRGKTNQNTG              | 3      | 657   | 672 | 37 (3)            |        | 0 (3)*  | -2 (4)* | -2 (3)* | -2 (3)*  | -4 (3)* | 1 (3)*   | 3 (3)*  |         |
| TGRGKTNQNTGMLTLPKQKCL        | 4      | 662   | 682 | 25 (1)            |        | -12 (2) | -6 (1)  | -5 (1)* | -1 (2)*  | -6 (2)  | -1 (2)*  | -6 (1)  |         |
| TGRGKTNQNTGMLTLPKQKCL        | 3      | 662   | 682 | 24 (1)            |        | -15 (2) | -4 (2)* | -4 (1)* | 0 (2)*   | -6 (4)  | 2 (3)*   |         |         |
| PAQKCL                       | 2      | 662   | 6   |                   |        |         |         |         |          |         |          |         |         |

# C268F RIG-I

| peptide sequence              | charge | start | end | structure (xxiii) | (xxiv)  | (xxv)   | (xxvi)  | (xxvii) | (xxviii) | (xxix)  | (xxx)   |         |
|-------------------------------|--------|-------|-----|-------------------|---------|---------|---------|---------|----------|---------|---------|---------|
| IATSVADEGID                   | 2      | 695   | 705 | Pincer            | 77 (2)  | -6 (3)  | -8 (5)  | -20 (3) | -3 (4)*  | -23 (3) | -3 (5)* | -38 (5) |
| IATSVADEGIDIAQCNL             | 2      | 695   | 711 |                   | 78 (2)  | -5 (3)* | -5 (4)* | -12 (3) | -4 (4)*  | -26 (4) | -3 (4)* | -40 (4) |
| IATSVADEGIDIAQCNLVILYEVGNVVKM | 3      | 695   | 724 |                   | 86 (2)  | -8 (2)  | -6 (3)  | -12 (3) | -2 (3)*  | -23 (2) | -2 (3)* | -45 (3) |
| VILYEVGNVVKM                  | 2      | 712   | 724 |                   | 66 (2)  | -21 (2) | -18 (2) | -13 (3) | -3 (3)*  | -19 (4) | -2 (2)* | -11 (2) |
| YEVGNVVKM                     | 2      | 715   | 724 |                   | 86 (2)  | -27 (3) | -21 (3) | -12 (3) | -4 (3)*  | -8 (3)  | -3 (3)* | -17 (3) |
| YVGNVVKM                      | 2      | 717   | 724 |                   | 84 (2)  | -28 (3) | -21 (3) | -12 (3) | -3 (3)*  | -6 (3)  | -4 (3)* | -17 (3) |
| IQTRGRGRARGSKC                | 4      | 725   | 738 |                   | 77 (4)  | -21 (4) | -15 (4) | -20 (5) | -5 (3)   | -18 (4) | -2 (5)* | -20 (5) |
| FLLTSNAGVIE                   | 2      | 739   | 749 |                   | 57 (2)  | -21 (2) | -14 (3) | -19 (2) | 3 (2)*   | 0 (1)*  | 2 (2)*  |         |
| FLLTSNAGVIEKEQINM             | 2      | 739   | 755 |                   | 58 (1)  | -28 (2) | -26 (1) | -24 (4) | -2 (2)*  | -4 (3)* | 0 (2)*  | 0 (2)*  |
| LTSNAGVIEKEQINM               | 2      | 741   | 755 |                   | 57 (1)  | -31 (3) | -28 (2) | -22 (2) | -1 (3)*  | -3 (2)* | -1 (3)* | 0 (3)*  |
| KEQINM                        | 2      | 750   | 755 |                   | 58 (2)  | -38 (4) | -33 (5) | -23 (3) | -2 (4)*  | -3 (3)* | -1 (4)* | -2 (5)* |
| YKEKMMNSIL                    | 3      | 756   | 766 |                   | 21 (3)  | -4 (4)* | -6 (4)  | 0 (4)*  | 0 (1)*   | 0 (4)*  | 0 (4)*  | 5 (3)   |
| YKEKMMNSIL                    | 2      | 756   | 766 |                   | 21 (3)  | -4 (4)* | -6 (4)  | -2 (4)* | 1 (3)*   | -1 (4)* | 0 (4)*  | 5 (4)*  |
| SILRLQT                       | 2      | 764   | 770 |                   | 27 (3)  | -4 (3)* | -3 (5)* | -4 (3)* | -1 (3)*  | -3 (3)* | 1 (4)*  | 10 (2)  |
| RLQTDWAEAVF                   | 2      | 767   | 776 |                   | 46 (1)  | -6 (2)  | -7 (2)  | -4 (2)* | 1 (2)*   | 2 (2)*  | 2 (3)*  | 7 (2)   |
| WDEAVF                        | 1      | 771   | 776 |                   | 86 (3)  | -1 (3)* | -2 (3)* | -6 (4)  | -2 (4)*  | -4 (2)* | 2 (3)*  | 3 (3)*  |
| RDSQEKPKVPDK                  | 2      | 791   | 803 |                   | 90 (2)  | -13 (3) | -18 (5) | -12 (2) | -3 (3)*  | -7 (3)  | 1 (3)*  | 1 (2)*  |
| VRVIEE                        | 2      | 823   | 828 |                   | 59 (1)  | 1 (2)*  | 3 (2)*  | -12 (2) | -1 (2)*  | -7 (2)  | -1 (2)* | -2 (2)* |
| VRVIEECHY                     | 3      | 823   | 831 |                   | 43 (1)  | -1 (2)* | 0 (3)*  | -8 (1)  | -2 (3)*  | -10 (3) | 1 (3)*  | 0 (3)*  |
| VRVIEECHYTVLGDA               | 3      | 823   | 837 |                   | 34 (1)  | -1 (2)* | 2 (0)*  | -11 (1) | -1 (2)*  | -9 (2)  | -1 (2)* | -1 (2)* |
| CHYTVLGDA                     | 2      | 829   | 837 | 30 (1)            | 1 (2)*  | 2 (2)*  | -3 (2)* | -1 (2)* | -3 (1)*  | 0 (2)*  | -2 (2)* |         |
| TVLGDAFKECF                   | 2      | 832   | 842 | 52 (2)            | -4 (3)* | -3 (3)* | -8 (3)  | -3 (3)* | -14 (3)  | 0 (3)*  | -1 (3)* |         |
| FKECF                         | 1      | 838   | 842 | 42 (3)            | -8 (4)  | -7 (4)  | -10 (3) | -3 (4)* | -9 (4)   | -2 (5)* | -4 (4)* |         |
| FKECF                         | 2      | 838   | 842 | 39 (3)            | -8 (4)  | -6 (4)  | -12 (4) | -4 (4)* | -2 (4)*  | -1 (4)* | -5 (4)* |         |
| FVSRPHPKPKQFSS                | 4      | 842   | 855 | 79 (3)            | -6 (4)  | -4 (5)* | -14 (4) | -4 (4)* | -10 (4)  | 0 (4)*  | 2 (5)*  |         |
| VSRPHPKPKQFSSF                | 4      | 843   | 856 | 77 (3)            | -6 (4)  | -4 (5)* | -14 (4) | -4 (4)* | -10 (4)  | 2 (5)*  | 4 (6)*  |         |
| VSRPHPKPKQFSSF                | 3      | 843   | 856 | 75 (2)            | -7 (4)  | -4 (5)* | -18 (4) | -2 (4)* | -11 (5)  | 2 (4)*  | 3 (6)*  |         |
| EKRAKIF                       | 2      | 857   | 863 | 49 (2)            | -13 (3) | -13 (3) | -14 (3) | -3 (0)* | -4 (4)*  | -1 (4)* | -3 (3)* |         |
| EKRAKIFC                      | 3      | 857   | 864 | 26 (2)            | -11 (3) | -12 (4) | -12 (3) | -2 (2)* | 0 (5)*   | -2 (0)* | -4 (4)* |         |
| EKRAKIFC                      | 2      | 857   | 864 | 48 (3)            | -10 (4) | -14 (3) | -19 (3) | -1 (2)* | -3 (2)*  | 0 (1)*  | 3 (4)*  |         |
| CARQNCSHDWGHVKYKT             | 4      | 864   | 881 | 35 (2)            | -16 (3) | -2 (2)* | -8 (2)  | -2 (3)* | 2 (5)*   | -3 (3)* | 3 (4)*  |         |
| FEIPVIES                      | 2      | 882   | 891 | 14 (1)            | -10 (2) | -6 (1)  | -9 (1)  | 0 (1)*  | 1 (1)*   | 4 (6)*  | 1 (2)*  |         |
| FEIPVIESF                     | 2      | 882   | 892 | 18 (1)            | -8 (2)  | -8 (2)  | -8 (1)  | 0 (1)*  | 1 (1)*   | 0 (1)*  | 0 (1)*  |         |
| FEIPVIESF                     | 2      | 883   | 892 | 14 (1)            | -6 (3)  | -6 (1)  | -9 (1)  | 0 (1)*  | 1 (1)*   | 4 (6)*  | 1 (2)*  |         |
| FVVEDIATGVQTL                 | 2      | 892   | 904 | 83 (2)            | -16 (3) | -17 (2) | -23 (2) | -3 (3)* | -21 (4)  | 0 (3)*  | -2 (3)* |         |
| VVEDIATGVQTL                  | 2      | 893   | 904 | 72 (2)            | -19 (3) | -17 (2) | -24 (2) | -3 (3)* | -11 (3)  | -2 (2)* | -5 (3)  |         |
| VVEDIATGVQTL                  | 1      | 893   | 904 | 71 (2)            | -19 (3) | -20 (3) | -19 (2) | -3 (3)* | -9 (4)   | -1 (3)* | -3 (3)* |         |
| EKIPFPAE                      | 2      | 914   | 922 | 51 (4)            | -1 (4)* | -1 (5)* | -7 (4)  | -3 (4)* | -9 (3)   | 0 (5)*  | -3 (4)* |         |
| EKIPFPAEMSK                   | 2      | 914   | 925 | 61 (4)            | -2 (4)* | -4 (6)* | -10 (4) | -3 (5)* | -9 (4)   | 0 (6)*  | -1 (5)* |         |
| EKIPFPAEMSK                   | 3      | 914   | 925 | 62 (4)            | -2 (4)* | -4 (6)* | -10 (4) | -3 (5)* | -6 (3)   | 0 (5)*  | -1 (5)* |         |

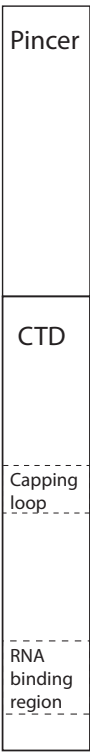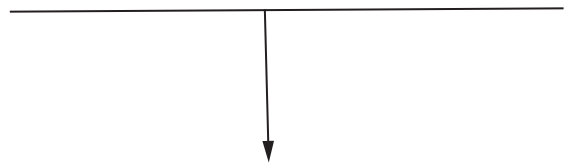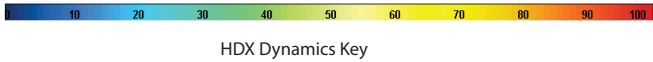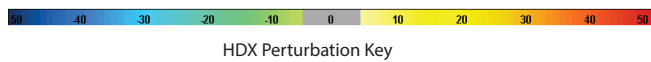

## Supplementary Figure 1

A summary of all HDX experiments. (a) Schematic representations of all HDX characterizations performed in this study. (b) HDX consolidation view for all studied conformational states of WT/H830A/E373A/C268F RIG-I with the experimental order in **Supplementary Fig 1a**. (c) HDX Experimental view for all studied conformational states of WT/H830A/E373A/C268F RIG-I with the experimental order in **Supplementary Fig 1a**. In Supplementary Fig 1c, specific RIG-I domain/motifs are defined in Fig 1a (CARD2 latch region is the region that intra-molecularly interacts with HEL2i gate motif in the apo receptor state. In HEL2i, the CTD:HEL2i region is the HEL2i region that CTD clashes with upon RNA agonist binding).

The values listed under each HDX experiments demonstrate the averaged difference in percentage of deuterium incorporation of that corresponding peptide either derived from apo protein or between two different states across all exchange time points (i.e., 0s, 10s, 60s, 300s, 600s, 900s, 1500s and 3600s). Including time 0s there were 8 time points and each time point was replicated with two independent MS runs per conformational state of receptor or receptor complex. HDX analyses were performed duplicate or triplicate, with single preparations of each protein ligand complex. The intensity weighted mean m/z centroid value of each peptide envelope was calculated and subsequently converted into a percentage of deuterium incorporation. Corrections for back-exchange were made on the basis of an estimated 70% deuterium recovery, and accounting for the known 80% deuterium content of the deuterium exchange buffer. When comparing the two samples, the perturbation %D is determined by calculating the difference between the two samples. HDX Workbench colors each peptide according to the smooth color gradient HDX perturbation key (D%) shown in each indicated figure. Differences in %D between -5% to 5% are considered non-significant and are colored gray according to the HDX perturbation key <sup>1</sup>. In addition to the -5% to 5% test, Unpaired t-tests are calculated to detect statistically significant ( $p < 0.05$ ) differences between samples at each time point. At least one time point with a p value less than 0.05 was present in the data set further confirming that the difference is significant. A negative value represents decreased deuterium incorporation or



stabilization while a positive value represents increased deuterium incorporation or destabilization in the corresponding region of the receptor when a binding event takes place. Peptides exhibiting statistically insignificant or undetectable changes are colored gray. Blank region represents undetected peptide for corresponding experiment. The deuterium incorporation data from all overlapping peptides were consolidated to individual amino acid values using a residue averaging approach <sup>2</sup>. HDX Workbench was used to automate mapping of gradient colors to pymol structure model <sup>3</sup>. For HDX experiments – i, ii, xii, xv and xxiii – measuring apo receptor dynamics, colors are coded according to HDX dynamics key. For the rest differential HDX experimental comparison views, colors are coded according to HDX perturbation key.

**a**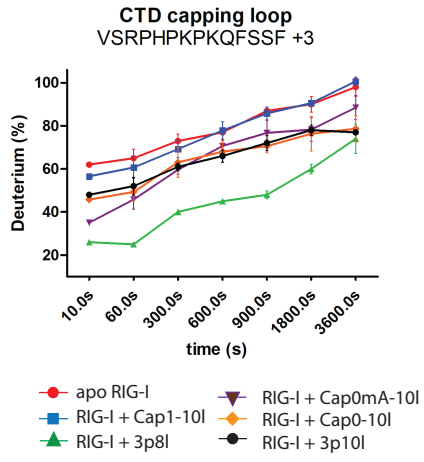**b**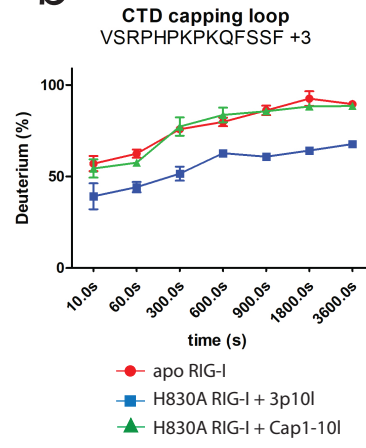

Supplementary Figure 2

C

| sequence                    | charge | start | end | structure | RIG-I ± 3p8I | sequence                    | charge | start | end | structure | RIG-I ± 3p8I |
|-----------------------------|--------|-------|-----|-----------|--------------|-----------------------------|--------|-------|-----|-----------|--------------|
| QDYIRKTLDPYIL               | 3      | 13    | 26  |           | 1 (2)*       | FKASGDHNL                   | 3      | 685   | 694 |           | 0 (5)*       |
| IRKTLDPYIL                  | 3      | 16    | 26  |           | 0 (3)*       | IATSVADGID                  | 2      | 695   | 705 |           | 0 (5)*       |
| SYMAPVFRFE                  | 2      | 27    | 35  |           | 3 (2)*       | IATSVADGIDIAQCNL            | 2      | 695   | 711 |           | -5 (4)*      |
| YMAPVFRFEVQ                 | 2      | 28    | 39  |           | 3 (2)*       | IATSVADGIDIAQCNLVLYEYVGNVKM | 3      | 695   | 724 |           | 0 (6)*       |
| VQYIQA                      | 2      | 38    | 43  |           | 1 (2)*       | SVADGIDIAQ                  | 2      | 698   | 708 |           | -1 (4)*      |
| YIQAEKNNKGMPEA              | 3      | 40    | 53  |           | -1 (4)*      | VLYEYVGNVKM                 | 2      | 712   | 724 |           | 2 (4)*       |
| EKNKNGPMEEAATL              | 2      | 44    | 56  |           | -1 (3)*      | YEVYVGNVKM                  | 2      | 715   | 724 |           | 0 (4)*       |
| LQEEGVRFRGFL                | 2      | 64    | 74  |           | 1 (3)*       | VYVGNVKM                    | 2      | 717   | 724 |           | 0 (4)*       |
| QEEGVRFRGFL                 | 2      | 65    | 74  |           | 2 (3)*       | IQRGRGRARQSKC               | 4      | 725   | 738 |           | 1 (4)*       |
| FRGLDA                      | 2      | 70    | 76  |           | 3 (1)*       | FLLTSNAGVIE                 | 2      | 739   | 749 |           | 1 (3)*       |
| DALDHAGYSGL                 | 2      | 75    | 85  |           | 1 (4)*       | FLLTSNAGVIEKEQINM           | 2      | 739   | 755 |           | 1 (4)*       |
| LDHAGYSGL                   | 2      | 77    | 85  |           | 0 (6)*       | LTSNAGVIEKEQINM             | 2      | 741   | 755 |           | 0 (5)*       |
| YEAIESW                     | 1      | 86    | 92  |           | -1 (1)*      | AGVIEKE                     | 2      | 745   | 751 |           | -1 (5)*      |
| YEAIESWD                    | 1      | 86    | 93  |           | -1 (2)*      | KEQINM                      | 2      | 750   | 755 |           | 0 (4)*       |
| FKIEKLEE                    | 3      | 94    | 102 |           | 0 (3)*       | YKEKMNDSIL                  | 2      | 756   | 766 |           | 3 (2)*       |
| YRLLL                       | 2      | 103   | 107 |           | 11 (4)       | YKEKMNDSIL                  | 3      | 756   | 766 |           | 2 (3)*       |
| YRLLLRLOPEF                 | 3      | 103   | 114 |           | 15 (4)       | SILRLQT                     | 2      | 764   | 770 |           | 3 (2)*       |
| LLKRLQPEF                   | 2      | 106   | 114 |           | 15 (5)       | RLQTWDEAVF                  | 2      | 767   | 776 |           | -2 (2)*      |
| LLKRLQPEF                   | 3      | 106   | 114 |           | 22 (6)       | WDEAVF                      | 1      | 771   | 776 |           | -3 (2)*      |
| KRLQPEF                     | 2      | 108   | 114 |           | 21 (6)       | FREKLIHQTHEKF               | 4      | 776   | 789 |           | 1 (1)*       |
| KRLQPEF                     | 3      | 108   | 114 |           | 22 (5)       | THEKFIRDS                   | 2      | 785   | 793 |           | 0 (0)*       |
| KTRIPTDISD                  | 3      | 115   | 126 |           | 4 (3)*       | EKFIRDSQEK                  | 2      | 787   | 796 |           | 2 (3)*       |
| KTRIPTDISDL                 | 2      | 115   | 127 |           | 3 (3)*       | VRVIEE                      | 2      | 823   | 828 |           | -5 (2)*      |
| KTRIPTDISDL                 | 3      | 115   | 127 |           | 3 (3)*       | VRVIEECHY                   | 2      | 823   | 831 |           | -6 (2)       |
| KTRIPTDISDLSLSE             | 3      | 115   | 129 |           | 3 (2)*       | VRVIEECHY                   | 3      | 823   | 831 |           | -8 (1)       |
| EELIQICSTKGMMAEAKL          | 3      | 137   | 155 |           | 8 (2)        | VRVIEECHYTVLGDA             | 3      | 823   | 837 |           | -3 (1)*      |
| ILQICSTKGMMAEAKL            | 2      | 139   | 152 |           | 7 (2)        | CHYTVLGDA                   | 2      | 829   | 837 |           | -1 (2)*      |
| ILQICSTKGMMAEAKL            | 3      | 139   | 155 |           | 5 (2)        | TVLGDAFKECF                 | 2      | 832   | 842 |           | -12 (5)      |
| ILQICSTKGMMAEAKLVE          | 3      | 139   | 157 |           | 8 (2)        | FKECF                       | 1      | 838   | 842 |           | -25 (5)      |
| LLRSDKENWPKTKL              | 4      | 159   | 173 |           | 1 (1)*       | FKECF                       | 2      | 838   | 842 |           | -27 (5)      |
| RSDKENWPKTKLAL              | 4      | 161   | 175 |           | 5 (2)        | FVSRPHPKQFSS                | 4      | 842   | 855 |           | 1 (5)*       |
| ALEKERNFSEL                 | 3      | 174   | 185 |           | 3 (4)*       | VSRPHPKQFSSF                | 3      | 843   | 856 |           | 2 (5)*       |
| ALEKERNFSEL                 | 4      | 174   | 185 |           | 3 (3)*       | VSRPHPKQFSSF                | 4      | 843   | 856 |           | 1 (5)*       |
| EKERKNSFSEL                 | 3      | 176   | 185 |           | 2 (4)*       | EKRAKIF                     | 2      | 857   | 863 |           | -12 (4)      |
| WVVEKQKDV                   | 3      | 186   | 196 |           | 0 (5)*       | EKRAKIFC                    | 3      | 857   | 864 |           | -12 (2)      |
| WVVEKQKDVETEDL              | 3      | 186   | 200 |           | 0 (6)*       | CARQNCSDHWGHWKVKYKT         | 4      | 864   | 881 |           | -3 (1)*      |
| WVVEKQKDVETEDLEDKMETSD      | 3      | 186   | 208 |           | -1 (5)*      | DWGHVVKYKTFEIPVKIESFVV      | 4      | 872   | 894 |           | -2 (3)*      |
| WVVEKQKDVETEDL              | 3      | 187   | 200 |           | 0 (1)*       | FEIPVKIES                   | 2      | 882   | 891 |           | -19 (3)      |
| EDMETSIDIQIF                | 2      | 201   | 212 |           | 0 (4)*       | FEIPVKIESF                  | 2      | 882   | 892 |           | -32 (1)      |
| FYQEDPEQNL                  | 2      | 212   | 222 |           | -1 (3)*      | EIPVKIESF                   | 2      | 883   | 892 |           | -19 (3)      |
| YQEDPEQNL                   | 2      | 213   | 222 |           | 0 (4)*       | FVVEDIATGVQTL               | 2      | 892   | 904 |           | -3 (2)*      |
| SENSCPPSEVSDTNL             | 2      | 223   | 237 |           | 0 (6)*       | VVEDIATGVQTL                | 1      | 893   | 904 |           | -4 (4)*      |
| NSCPPSEVSDTNL               | 2      | 225   | 237 |           | -1 (6)*      | VVEDIATGVQTL                | 2      | 893   | 904 |           | -4 (3)*      |
| VSDTNL                      | 1      | 232   | 237 |           | 0 (5)*       | IATGVQTL                    | 2      | 897   | 904 |           | 3 (5)*       |
| YSPFKPRN                    | 3      | 238   | 245 |           | 0 (5)*       | YSKWKDFHFEKPFDPAE           | 3      | 905   | 922 |           | 2 (3)*       |
| YSPFKPRNYOLE                | 2      | 238   | 249 |           | 4 (5)*       | EKPFDPAEIMSK                | 2      | 914   | 925 |           | -3 (4)*      |
| YSPFKPRNYOLE                | 3      | 238   | 249 |           | 4 (5)*       | EKPFDPAEIMSK                | 3      | 914   | 925 |           | -4 (5)*      |
| LALPAMKGNKNTIC              | 2      | 250   | 263 |           | 1 (1)*       |                             |        |       |     |           |              |
| LALPAMKGNKNTICAPTGGCKTFVSL  | 3      | 250   | 276 |           | 1 (4)*       |                             |        |       |     |           |              |
| LALPAMKGNKNTICAPTGGCKTFVSL  | 4      | 250   | 276 |           | -2 (2)*      |                             |        |       |     |           |              |
| APTGGCKTF                   | 2      | 264   | 272 |           | 1 (4)*       |                             |        |       |     |           |              |
| PGQKGVV                     | 3      | 286   | 295 |           | -1 (3)*      |                             |        |       |     |           |              |
| FANIQPVYEQQ                 | 2      | 296   | 306 |           | 0 (4)*       |                             |        |       |     |           |              |
| FANIQPVYEQQKSVF             | 2      | 296   | 310 |           | -3 (5)*      |                             |        |       |     |           |              |
| FANIQPVYEQQKSVFSKY          | 3      | 296   | 313 |           | 0 (2)*       |                             |        |       |     |           |              |
| FERHGVRTGISGATAENVPVEQIVENN | 4      | 314   | 344 |           | -1 (2)*      |                             |        |       |     |           |              |
| GYRVTGISGATAENVPVEQIVENN    | 4      | 318   | 341 |           | 0 (3)*       |                             |        |       |     |           |              |
| YRVTGISGATAENVPVEQIVE       | 3      | 319   | 339 |           | 1 (4)*       |                             |        |       |     |           |              |
| IILTPQIL                    | 1      | 343   | 351 |           | -3 (1)*      |                             |        |       |     |           |              |
| IILTPQIL                    | 2      | 343   | 351 |           | -3 (1)*      |                             |        |       |     |           |              |
| IILTPQILVN                  | 2      | 343   | 353 |           | -6 (1)       |                             |        |       |     |           |              |
| IILTPQILVNN                 | 2      | 343   | 354 |           | -6 (2)       |                             |        |       |     |           |              |
| IILTPQILVNNL                | 2      | 343   | 355 |           | -5 (2)*      |                             |        |       |     |           |              |
| IILTPQILVNNLKKGTIPSL        | 2      | 343   | 363 |           | -3 (5)*      |                             |        |       |     |           |              |
| IILTPQILVNNLKKGTIPSL        | 3      | 343   | 363 |           | -3 (5)*      |                             |        |       |     |           |              |
| IILTPQILVNNLKKGTIPSLSI      | 3      | 343   | 365 |           | -3 (5)*      |                             |        |       |     |           |              |
| IILTPQILVNNLKKGTIPSLSF      | 3      | 343   | 366 |           | -3 (4)*      |                             |        |       |     |           |              |
| KGTIPSLSIFT                 | 2      | 357   | 367 |           | 0 (2)*       |                             |        |       |     |           |              |
| KGTIPSLSIFT                 | 3      | 357   | 367 |           | 0 (2)*       |                             |        |       |     |           |              |
| LMFDECHNTSKQHPYIM           | 3      | 368   | 385 |           | -2 (2)*      |                             |        |       |     |           |              |
| IFDECHNTSKQHPYIMM           | 2      | 370   | 387 |           | -3 (3)*      |                             |        |       |     |           |              |
| IFDECHNTSKQHPYIMM           | 3      | 370   | 387 |           | -2 (2)*      |                             |        |       |     |           |              |
| FNYLDQKLGSSGRLPQVIG         | 2      | 388   | 407 |           | 0 (1)*       |                             |        |       |     |           |              |
| FNYLDQKLGSSGRLPQVIGL        | 2      | 388   | 408 |           | 0 (1)*       |                             |        |       |     |           |              |
| DQKLGSSGRLPQVIGL            | 2      | 392   | 408 |           | 0 (2)*       |                             |        |       |     |           |              |
| LTSASVGVGDAKNITDEAL         | 2      | 408   | 424 |           | 0 (3)*       |                             |        |       |     |           |              |
| TASVGVGDAKNITDEAL           | 2      | 409   | 424 |           | 1 (4)*       |                             |        |       |     |           |              |
| TASVGVGDAKNITDEALD          | 2      | 409   | 425 |           | 0 (5)*       |                             |        |       |     |           |              |
| TASVGVGDAKNITDEALDYICKL     | 3      | 409   | 430 |           | 3 (2)*       |                             |        |       |     |           |              |
| DYICKL                      | 1      | 425   | 430 |           | 0 (1)*       |                             |        |       |     |           |              |
| DYICKL                      | 2      | 425   | 430 |           | 0 (0)*       |                             |        |       |     |           |              |
| CASLDASVIATVKHNL            | 2      | 431   | 448 |           | 1 (4)*       |                             |        |       |     |           |              |
| CASLDASVIATVKHNL            | 2      | 431   | 449 |           | -1 (1)*      |                             |        |       |     |           |              |
| SVIATVKHNL                  | 2      | 437   | 448 |           | -1 (1)*      |                             |        |       |     |           |              |
| EQVYKPKQF                   | 3      | 450   | 459 |           | 0 (3)*       |                             |        |       |     |           |              |
| VVYKPKQF                    | 2      | 452   | 459 |           | 2 (3)*       |                             |        |       |     |           |              |
| VVYKPKQF                    | 3      | 452   | 459 |           | 2 (3)*       |                             |        |       |     |           |              |
| MRTDSL                      | 2      | 479   | 485 |           | 0 (1)*       |                             |        |       |     |           |              |
| AKRICKLENL                  | 3      | 486   | 496 |           | 1 (3)*       |                             |        |       |     |           |              |
| SGIQNREFGTQ                 | 2      | 497   | 507 |           | 1 (4)*       |                             |        |       |     |           |              |
| SGIQNREFGTQKYEQ             | 3      | 497   | 511 |           | 0 (6)*       |                             |        |       |     |           |              |
| SGIQNREFGTQKYEQW            | 3      | 497   | 512 |           | 0 (5)*       |                             |        |       |     |           |              |
| WVTVQKACM                   | 2      | 512   | 521 |           | 0 (5)*       |                             |        |       |     |           |              |
| WVTVQKACM                   | 2      | 513   | 521 |           | 0 (1)*       |                             |        |       |     |           |              |
| VFGMPKDEESRICKA             | 3      | 522   | 537 |           | 0 (5)*       |                             |        |       |     |           |              |
| VFGMPKDEESRICKALF           | 4      | 522   | 539 |           | 0 (4)*       |                             |        |       |     |           |              |
| FQMPKDEESRICKA              | 3      | 523   | 537 |           | 1 (4)*       |                             |        |       |     |           |              |
| FQMPKDEESRICKALF            | 4      | 523   | 539 |           | 1 (4)*       |                             |        |       |     |           |              |
| LYTSHLRKYNDAL               | 3      | 540   | 552 |           | 0 (4)*       |                             |        |       |     |           |              |
| LYTSHLRKYNDAL               | 4      | 540   | 552 |           | 0 (4)*       |                             |        |       |     |           |              |
| YTSHLRKYNDAL                | 2      | 541   | 552 |           | 0 (4)*       |                             |        |       |     |           |              |
| ISEHARMKDALD                | 3      | 553   | 565 |           | 0 (1)*       |                             |        |       |     |           |              |
| HARMKDALD                   | 2      | 557   | 565 |           | -1 (2)*      |                             |        |       |     |           |              |
| HARMKDALD                   | 3      | 557   | 565 |           | 0 (1)*       |                             |        |       |     |           |              |
| DYLDKFFSNVRAAGF             | 3      | 565   | 579 |           | 2 (3)*       |                             |        |       |     |           |              |
| YLDKFFSNV                   | 2      | 566   | 574 |           | 0 (0)*       |                             |        |       |     |           |              |
| YLDKFFSNVRAAGF              | 3      | 566   | 579 |           | -1 (3)*      |                             |        |       |     |           |              |
| FFSNV                       | 1      | 570   | 574 |           | 1 (2)*       |                             |        |       |     |           |              |
| FFSNVRAAGF                  | 2      | 570   | 579 |           | 1 (2)*       |                             |        |       |     |           |              |
| AAGFDEEQDLT                 | 2      | 576   | 587 |           | -2 (3)*      |                             |        |       |     |           |              |
| DEEQDLTORFEELQ              | 3      | 580   | 596 |           | 2 (1)*       |                             |        |       |     |           |              |
| DEEQDLTORFEELQEL            | 3      | 580   | 597 |           | 2 (1)*       |                             |        |       |     |           |              |
| DEEQDLTORFEELQELLES         | 3      | 580   | 599 |           | 2 (1)*       |                             |        |       |     |           |              |
| QELESVSRDPSNENPKLED         | 3      | 613   | 613 |           | -1 (5)*      |                             |        |       |     |           |              |
| ESVSRDPSNENPKLEDLC          | 3      | 615   | 615 |           | 0 (6)*       |                             |        |       |     |           |              |
| VSRDPSNENPKL                | 3      | 600   | 611 |           | 2 (3)*       |                             |        |       |     |           |              |
| VSRDPSNENPKLED              | 2      | 600   | 613 |           | 0 (5)*       |                             |        |       |     |           |              |
| FILQEEYHLNPET               | 2      | 616   | 628 |           | -1 (2)*      |                             |        |       |     |           |              |
| ILQEEYHLNPETTL              | 2      | 617   | 632 |           | 0 (1)*       |                             |        |       |     |           |              |
| EYHLNPETTLFVKTR             | 2      | 620   | 637 |           | 0 (2)*       |                             |        |       |     |           |              |
| FVKTRALVDALKWIEGNPKL        | 3      | 633   | 653 |           | 0 (3)*       |                             |        |       |     |           |              |
| WIEGNPKL                    | 2      | 646   | 653 |           | 0 (4)*       |                             |        |       |     |           |              |
| WIEGNPKLSFLKPGIL            | 2      | 646   | 661 |           | 1 (5)*       |                             |        |       |     |           |              |
| SFLKPGIL                    | 2      | 654   | 661 |           | 0 (6)*       |                             |        |       |     |           |              |
| KPGLTGRGKTNQNTG             | 3      | 657   | 672 |           | 1 (3)*       |                             |        |       |     |           |              |
| TGRGKTNQNTGMTLPAQKCL        | 3      | 662   | 682 |           | 1 (4)*       |                             |        |       |     |           |              |
| TGRGKTNQNTGMTLPAQKCL        | 4      | 662   | 682 |           | 1 (4)*       |                             |        |       |     |           |              |
| PAQKCL                      | 2      | 676   | 682 |           | 1 (2)*       |                             |        |       |     |           |              |
| DAFKASGDHNL                 | 2      | 683   | 694 |           | 0 (5)*       |                             |        |       |     |           |              |
| DAFKASGDHNL                 | 3      | 683   | 694 |           | 0 (5)*       |                             |        |       |     |           |              |

latch region

CARD2

motif Ic

CTD  
RNA binding region  
RNA binding region  
RNA binding region  
RNA binding region

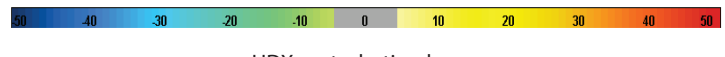

HDX perturbation key

Supplementary Figure 2

**d**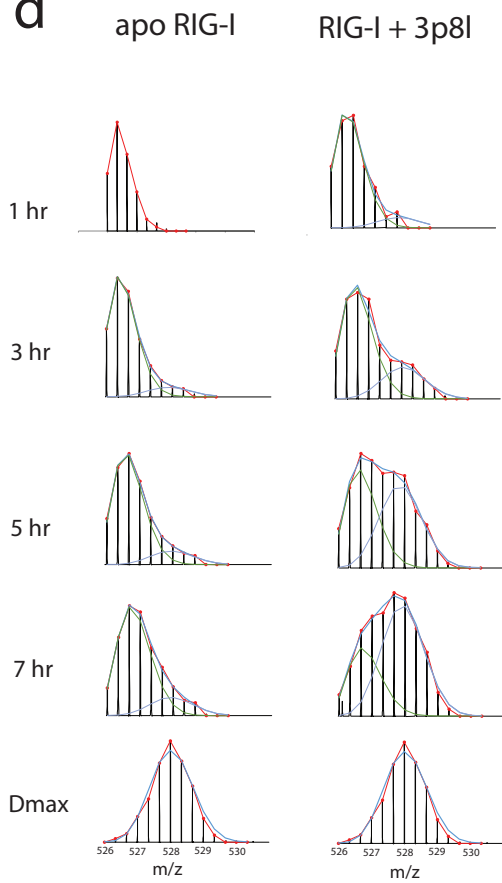**g**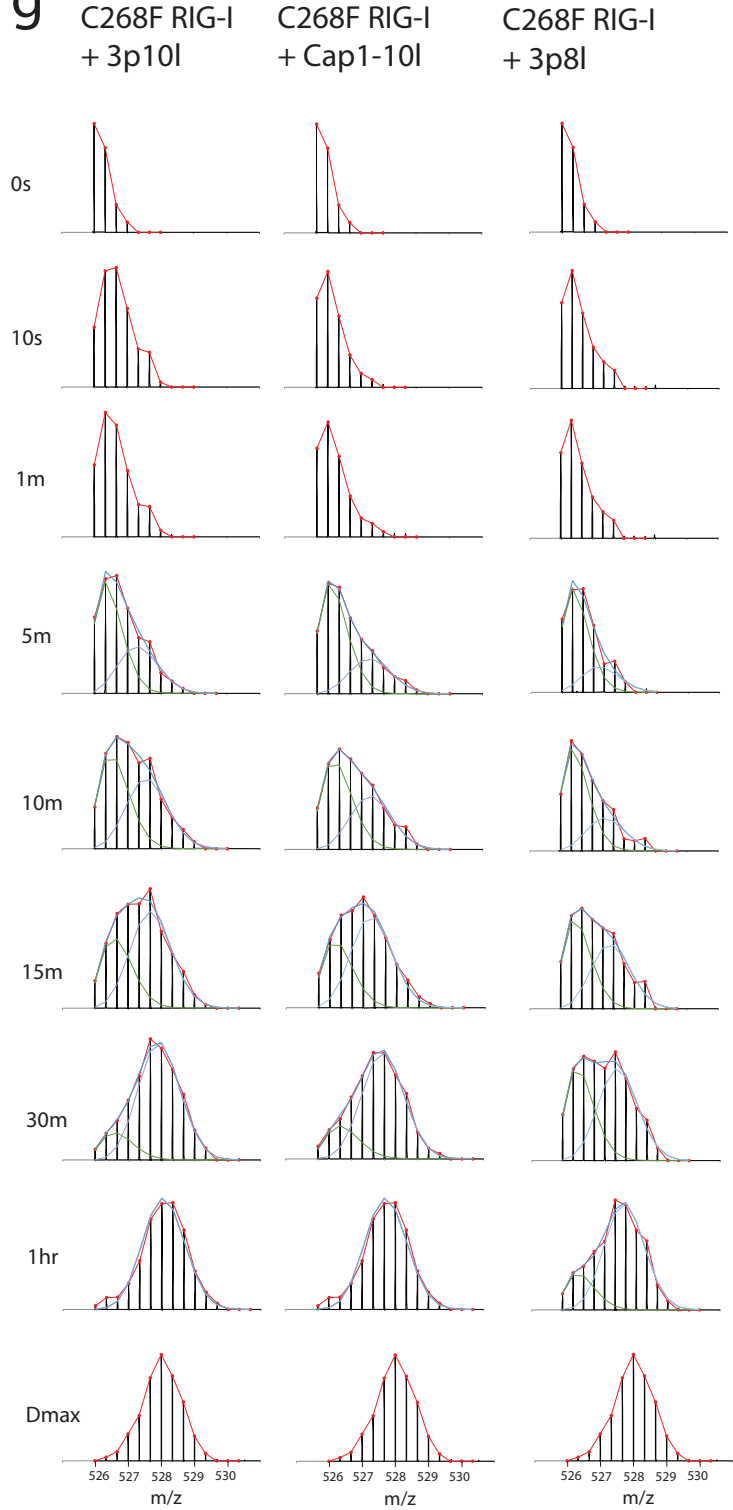**e**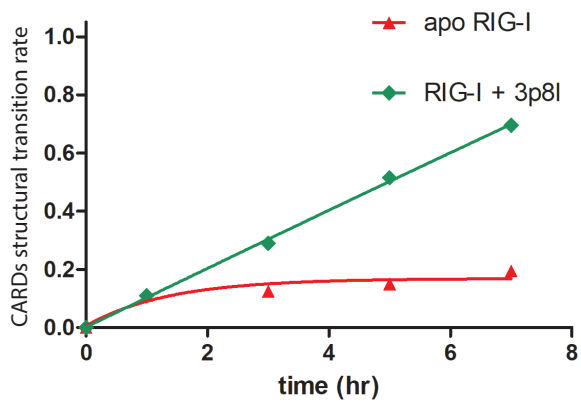**f**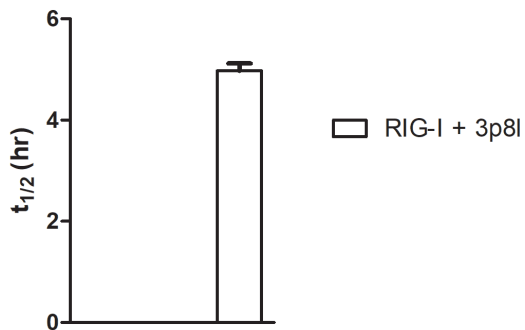

Supplementary Figure 2



## Supplementary Figure 2

Differential deuterium uptake plots of CTD capping loop peptide region (VSRPHPKPKQFSSF, +3) of WT (a) and H830A RIG-I (b) upon receptor perturbed by indicated RNAs. The data are plotted as percent deuterium uptake versus time on a logarithmic scale. The HDX plots of this CTD capping loop peptide between indicated groups were statistically analyzed by HDX Workbench (Supplementary Fig. 1c) <sup>1</sup>. (c) HDX perturbation view of RIG-I with and without 3p8l in longer HDX-MS time points (3 hr and 5 hr). This HDX perturbation view is presented as Supplementary Fig. 1c. (d) MS spectra of RIG-I CARD2 latch peptide Y103-114 derived from indicated complexes in indicated on-exchange time points. The quantity of each mass population was determined as Fig. 2a. (e) In each indicated state, the fraction of RIG-I CARDs molecules in the higher MS population (open conformation) to the total amount is plotted against the incubation HDX time points as Fig. 2c. (f) Half-life ( $t_{1/2}$ ) of respective partial unfolding event is determined by fitting an exponential curve as Fig. 2d. No half-life ( $t_{1/2}$ ) of partial unfolding event is predicted I apo RIG-I in the indicated time points. (g) MS spectra of C268F RIG-I CARD2 latch peptide Y103-114 derived from indicated complexes in indicated on-exchange time points. The quantity of each mass population was determined as Fig. 2a.

### ATPase based RNA titration\_wt RIG-I\_37 °C

1 mM ATP / 10 nM wt RIG-I / RNA titration / 1X ATPase buffer

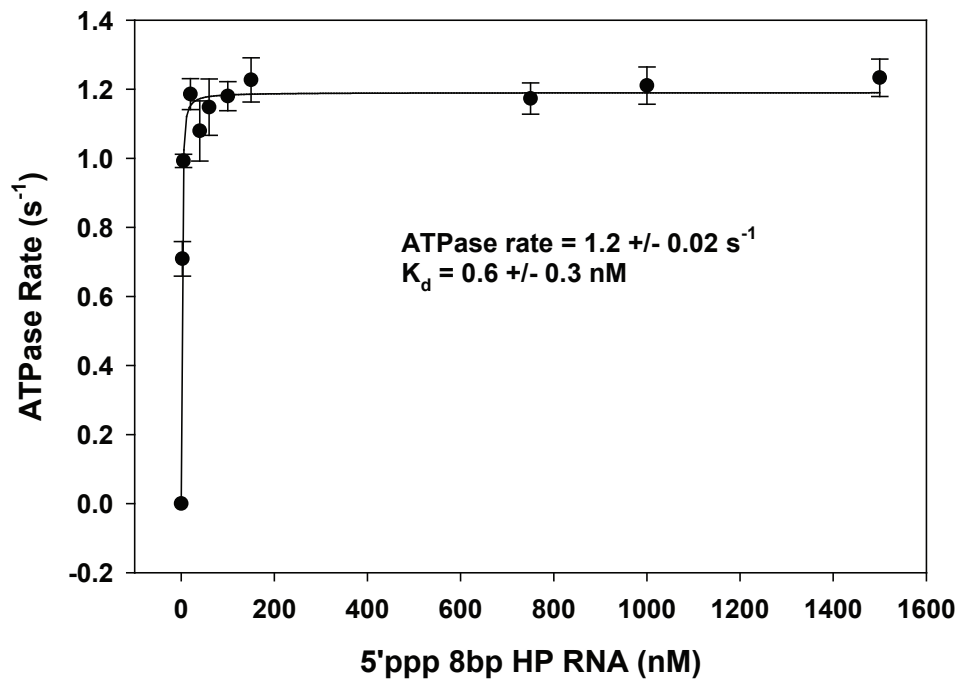

### ATPase based RNA titration\_wt RIG-I\_37 °C

1 mM ATP / 10 nM wt RIG-I / RNA titration / 1X ATPase buffer

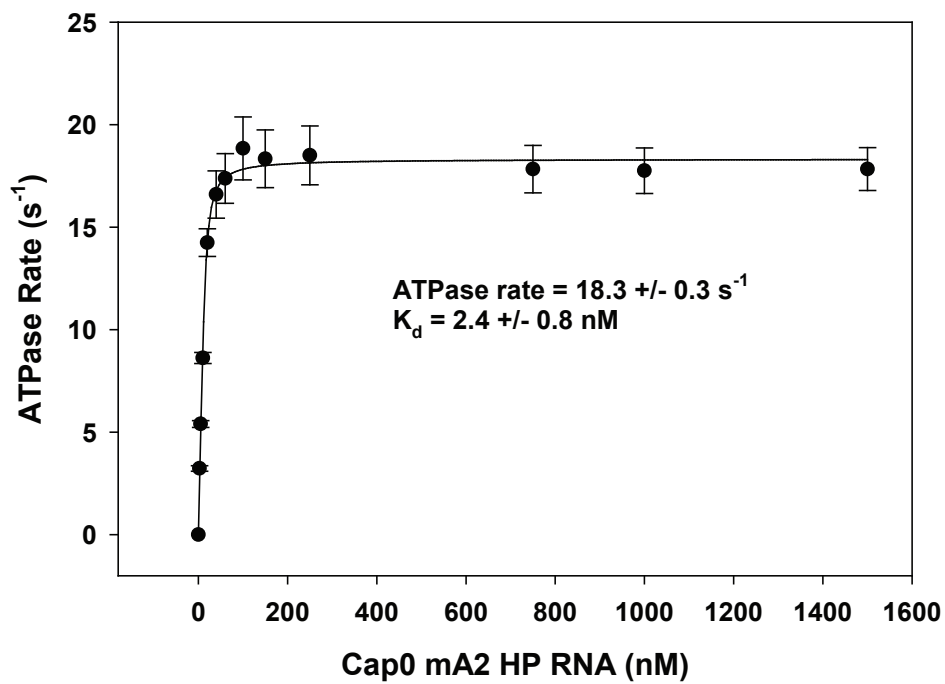

### Supplementary Figure 3 (related to Table 1)

$K_d$ , ATPase hydrolysis activity of WT RIG-I for 3p8I and Cap0mA-10I. The data is derived from radiometric ATPase assay wherein a fixed concentration of protein is titrated with increasing concentration of RNA. The curves are fit to the quadratic equation to obtain the  $k_{atpase}$  and  $k_{d, app}$  values. Error bars are from the time courses of the ATPase rate measurements at each RNA concentration.

**Supplementary Table 1.** Primers for generating RIG-I mutants

| RIG-I mutants | Prime sequence                                                                                        |
|---------------|-------------------------------------------------------------------------------------------------------|
| <b>H830A</b>  | 5'-GAGTGATAGAGGAATGCGCTTACACTGTGCTTGGAGATG-3'<br>5'-CATCTCCAAGCACAGTGTAAGCGCATTCCCTCTATCACTC-3'       |
| <b>E373A</b>  | 5'-CTTTGATGATATTTGATGCGTGCCACAACACTAGTAAACAAC-3'<br>5'-GTTGTTTACTAGTGTTGTGGCACGCATCAAATATCATCAAAG-3'  |
| <b>C268F</b>  | 5'-ATATGTGCTCCTACAGGTTTTGGAAAACCTTTGTTTCACTGC-3'<br>5'-GCAGTGAAACAAAGGTTTTTCCAAAACCTGTAGGAGCACATAT-3' |

### References:

1. Pascal, B.D. et al. HDX workbench: software for the analysis of H/D exchange MS data. *J Am Soc Mass Spectrom* **23**, 1512-21 (2012).
2. Keppel, T.R. & Weis, D.D. Mapping residual structure in intrinsically disordered proteins at residue resolution using millisecond hydrogen/deuterium exchange and residue averaging. *J Am Soc Mass Spectrom* **26**, 547-54 (2015).
3. Zheng, J. et al. High-resolution HDX-MS reveals distinct mechanisms of RNA recognition and activation by RIG-I and MDA5. *Nucleic Acids Res* **43**, 1216-30 (2015).
